# Supplementary material for: Genome-Wide De Novo Prediction of Cis-Regulatory Binding Sites in Mycobacterium tuberculosis H37Rv
Source: PLoS One. 2016 Feb 17;11(2):e0148965. doi: 10.1371/journal.pone.0148965 (PMC4757040; doi:10.1371/journal.pone.0148965)
Supplement: S4 Table — (XLSX) [file pone.0148965.s008.xlsx]

## Sheet: Sheet1
Table S4: Overrepresented clusters and binding sites for each TF of 65 TFs in TBDB.
Rv0023
PBS	PBS_Start	PBS_End	ChiP.Peak.Height.Percentile	P_value
PBS_30-10	831741	831755	89.924	0.0264315
PBS_30-69	1021927	1021941	84.859	0.0264315
PBS_30-92	2123157	2123171	89.233	0.0264315
PBS_30-45	2245183	2245197	88.482	0.0264315
PBS_30-19	2424859	2424873	91.031	0.0264315
PBS_30-95	2424906	2424920	91.031	0.0264315
PBS_30-47	2578961	2578975	93.472	0.0264315
PBS_30-76	3798786	3798800	96.102	0.0264315
PBS_30-29	4387225	4387239	97.252	0.0264315
PBS_30-40	4386950	4386964	97.252	0.0264315
PBS_30-52	4387148	4387162	97.252	0.0264315
PBS_30-53	4387297	4387311	97.252	0.0264315
PBS_30-59	4387332	4387346	97.252	0.0264315
PBS_30-89	4387091	4387105	97.252	0.0264315
Rv0047c
PBS	PBS_Start	PBS_End	ChiP.Peak.Height.Percentile	P_value
PBS_146-8	3304273	3304287	91.897	0.0380479
PBS_146-4	3842207	3842221	98.178	0.0380479
PBS_146-11	3843004	3843018	98.178	0.0380479
PBS_146-5	3847133	3847147	98.22	0.0380479
PBS_146-18	3847076	3847090	98.22	0.0380479
PBS_160-15	1928898	1928907	96.851	0.0380479
PBS_160-17	1929011	1929020	96.851	0.0380479
PBS_160-21	1928946	1928955	96.851	0.0380479
PBS_160-11	3842205	3842214	98.178	0.0380479
PBS_160-12	3847131	3847140	98.22	0.0380479
PBS_235-9	930675	930684	89.936	0.0434598
PBS_235-1	3304332	3304341	91.897	0.0434598
PBS_235-3	3304273	3304282	91.897	0.0434598
PBS_235-20	3304381	3304390	91.897	0.0434598
Rv0067c
PBS	PBS_Start	PBS_End	ChiP.Peak.Height.Percentile	P_value
PBS_151-4	75208	75228	99.75	0
PBS_151-6	75270	75290	99.75	0
Rv0078
PBS	PBS_Start	PBS_End	ChiP.Peak.Height.Percentile	P_value
PBS_57-31	86475	86485	97.366	7.8e-05
PBS_87-33	86509	86519	97.366	7.8e-05
PBS_39-23	86511	86519	97.366	0.000186022
Rv0081
PBS	PBS_Start	PBS_End	ChiP.Peak.Height.Percentile	P_value
PBS_206-15	136191	136200	93.119	0.00125825
PBS_206-16	136026	136035	93.119	0.00125825
PBS_206-54	136277	136286	93.119	0.00125825
PBS_206-25	596641	596650	97.219	0.00125825
PBS_206-3	1287226	1287235	83.508	0.00125825
PBS_206-20	1287062	1287071	83.508	0.00125825
PBS_206-30	1287133	1287142	83.508	0.00125825
PBS_206-1	1348642	1348651	83.855	0.00125825
PBS_206-12	1535610	1535619	85.933	0.00125825
PBS_206-31	1535434	1535443	85.933	0.00125825
PBS_206-43	1535522	1535531	85.933	0.00125825
PBS_206-60	1535673	1535682	85.933	0.00125825
PBS_206-28	1915493	1915502	93.439	0.00125825
PBS_206-53	2405534	2405543	96.003	0.00125825
PBS_206-27	2603469	2603478	96.995	0.00125825
PBS_206-35	2603595	2603604	96.995	0.00125825
PBS_70-1	1338535	1338548	85.867	0.00125825
PBS_70-5	1338536	1338549	85.867	0.00125825
PBS_70-6	1338747	1338760	85.867	0.00125825
PBS_70-9	1338809	1338822	85.867	0.00125825
PBS_70-11	1338810	1338823	85.867	0.00125825
PBS_70-13	1338572	1338585	85.867	0.00125825
PBS_70-23	2393378	2393391	80.512	0.00125825
PBS_70-15	3015127	3015140	94.012	0.00125825
PBS_70-16	4062217	4062230	97.846	0.00125825
PBS_218-19	1556	1563	96.078	0.0443874
PBS_218-18	256046	256053	88.666	0.0443874
PBS_218-7	1178996	1179003	97.55	0.0443874
PBS_218-16	1524965	1524972	87.565	0.0443874
PBS_218-5	1695215	1695222	94.422	0.0443874
PBS_218-9	3086776	3086783	98.166	0.0443874
Rv0135c
PBS	PBS_Start	PBS_End	ChiP.Peak.Height.Percentile	P_value
PBS_29-26	612157	612164	89.249	0.00969839
PBS_29-35	2057461	2057468	86.054	0.00969839
PBS_29-32	2969782	2969789	89.357	0.00969839
PBS_29-58	3183122	3183129	83.149	0.00969839
PBS_128-3	105301	105315	94.908	0.00969839
PBS_128-8	105216	105230	94.908	0.00969839
PBS_128-18	1760943	1760957	99.566	0.00969839
PBS_201-12	3193348	3193358	99.173	0.00969839
PBS_201-16	4087448	4087458	98.468	0.00969839
PBS_212-17	982671	982679	89.101	0.00969839
PBS_212-1	2768246	2768254	95.022	0.00969839
PBS_218-10	105234	105241	94.908	0.00969839
PBS_218-11	612151	612158	89.249	0.00969839
PBS_246-14	4408212	4408225	80.693	0.00969839
PBS_246-17	4408268	4408281	80.693	0.00969839
PBS_198-11	982741	982752	89.101	0.0112548
PBS_198-20	2582331	2582342	80.358	0.0112548
PBS_142-11	2969678	2969688	89.357	0.0231248
PBS_142-26	3411172	3411182	81.291	0.0231248
PBS_238-31	842005	842012	99.258	0.0330875
PBS_238-21	2969735	2969742	89.357	0.0330875
PBS_54-21	612095	612102	89.249	0.0386179
PBS_54-22	612170	612177	89.249	0.0386179
PBS_54-39	612185	612192	89.249	0.0386179
PBS_131-6	163295	163302	99.952	0.0399063
PBS_131-4	1760963	1760970	99.566	0.0399063
PBS_222-21	3193285	3193295	99.173	0.0399063
PBS_222-26	3193234	3193244	99.173	0.0399063
PBS_207-9	612158	612173	89.249	0.0472047
PBS_227-12	982699	982709	89.101	0.0479175
PBS_227-26	982636	982646	89.101	0.0479175
Rv0232
PBS	PBS_Start	PBS_End	ChiP.Peak.Height.Percentile	P_value
PBS_171-19	277785	277797	87.933	6.94e-06
PBS_171-20	277841	277853	87.933	6.94e-06
PBS_34-31	277773	277787	87.933	0.000134486
PBS_34-49	277813	277827	87.933	0.000134486
PBS_44-19	277884	277897	87.933	0.000552946
PBS_56-37	277773	277787	87.933	0.000552946
PBS_94-23	277774	277782	87.933	0.000552946
PBS_225-17	277874	277887	87.933	0.000680978
Rv0273c
PBS	PBS_Start	PBS_End	ChiP.Peak.Height.Percentile	P_value
PBS_248-14	3177481	3177502	91.864	0.000456665
PBS_248-18	3177486	3177507	91.864	0.000456665
PBS_181-17	31941	31951	94.458	0.000505486
PBS_181-19	31840	31850	94.458	0.000505486
PBS_114-8	3177382	3177402	91.864	0.00178848
PBS_207-1	330342	330357	100	0.00178848
PBS_96-5	330359	330369	100	0.00178848
PBS_175-10	330352	330362	100	0.00232447
PBS_205-5	3177267	3177277	91.864	0.00232447
PBS_224-11	4190574	4190581	84.105	0.00232447
PBS_244-4	3177517	3177528	91.864	0.00232447
PBS_245-9	330400	330414	100	0.00232447
PBS_111-12	3177438	3177445	91.864	0.00424231
PBS_242-23	32001	32008	94.458	0.00619012
PBS_44-23	4190602	4190615	84.105	0.00680653
PBS_127-48	330338	330351	100	0.00699761
PBS_237-39	3177517	3177529	91.864	0.00699761
PBS_25-39	330355	330368	100	0.00699761
PBS_29-48	3177381	3177388	91.864	0.0125786
PBS_45-9	3177295	3177304	91.864	0.0165485
PBS_34-110	4190693	4190707	84.105	0.0268178
PBS_4-105	3177384	3177398	91.864	0.044792
PBS_1-67	32040	32053	94.458	0.0486542
PBS_1-102	3177388	3177401	91.864	0.0486542
PBS_6-123	330404	330414	100	0.0486542
Rv0302
PBS	PBS_Start	PBS_End	ChiP.Peak.Height.Percentile	P_value
PBS_246-7	4408320	4408333	88.069	0.00307257
PBS_246-14	4408212	4408225	88.069	0.00307257
PBS_246-17	4408268	4408281	88.069	0.00307257
PBS_84-39	364487	364497	99.52	0.00352596
PBS_84-3	901479	901489	87.58	0.00352596
PBS_84-47	901562	901572	87.58	0.00352596
PBS_84-50	3347788	3347798	82.461	0.00352596
PBS_84-53	3347858	3347868	82.461	0.00352596
PBS_29-9	901341	901348	87.58	0.00578339
PBS_29-61	901477	901484	87.58	0.00578339
PBS_29-28	1177482	1177489	96.911	0.00578339
PBS_29-49	1177598	1177605	96.911	0.00578339
PBS_29-60	1177409	1177416	96.911	0.00578339
PBS_241-10	851549	851563	93.39	0.013337
PBS_241-1	3908057	3908071	93.258	0.013337
PBS_168-1	2580282	2580292	95.771	0.0156813
PBS_168-12	2580406	2580416	95.771	0.0156813
PBS_199-5	1702735	1702749	94.712	0.0323713
PBS_199-15	1702782	1702796	94.712	0.0323713
PBS_209-25	3347858	3347865	82.461	0.0341326
PBS_209-43	3347756	3347763	82.461	0.0341326
PBS_209-44	3347916	3347923	82.461	0.0341326
PBS_100-1	2228651	2228659	97.122	0.0384369
PBS_100-20	2228821	2228829	97.122	0.0384369
PBS_125-5	1702676	1702690	94.712	0.0384369
PBS_125-15	3407781	3407795	97.191	0.0384369
PBS_126-3	143907	143917	99.557	0.0384369
PBS_126-17	241393	241403	83.095	0.0384369
PBS_139-21	901359	901366	87.58	0.0384369
PBS_139-1	2393344	2393351	99.943	0.0384369
PBS_148-9	241473	241480	83.095	0.0384369
PBS_148-5	1177432	1177439	96.911	0.0384369
Rv0324
PBS	PBS_Start	PBS_End	ChiP.Peak.Height.Percentile	P_value
PBS_249-14	1158771	1158780	83.556	0.000448251
PBS_249-23	1158804	1158813	83.556	0.000448251
PBS_249-25	1158878	1158887	83.556	0.000448251
PBS_249-20	3358576	3358585	89.897	0.000448251
PBS_249-17	3541427	3541436	89.776	0.000448251
PBS_249-24	4057186	4057195	93.372	0.000448251
PBS_233-67	2596294	2596304	88.926	0.0209733
PBS_233-17	4057393	4057403	93.372	0.0209733
PBS_233-35	4056759	4056769	93.372	0.0209733
PBS_233-52	4056666	4056676	93.372	0.0209733
PBS_233-66	4057077	4057087	93.372	0.0209733
PBS_164-3	2187371	2187383	86.334	0.0209733
PBS_164-14	2187179	2187191	86.334	0.0209733
PBS_164-13	4057435	4057447	93.372	0.0209733
PBS_145-7	4185990	4186005	94.621	0.0209733
PBS_145-8	4185990	4186005	94.621	0.0209733
PBS_93-12	542112	542122	95.692	0.029638
PBS_93-67	541932	541942	95.692	0.029638
PBS_93-74	541975	541985	95.692	0.029638
PBS_93-14	2187334	2187344	86.334	0.029638
PBS_93-7	3489317	3489327	93.427	0.029638
PBS_238-10	541921	541928	95.692	0.0298765
PBS_238-17	542082	542089	95.692	0.0298765
PBS_238-24	541972	541979	95.692	0.0298765
Rv0330c
PBS	PBS_Start	PBS_End	ChiP.Peak.Height.Percentile	P_value
PBS_175-8	396093	396103	98.799	3.25e-05
PBS_88-44	396093	396102	98.799	5.83e-05
PBS_6-105	396095	396105	98.799	0.000573248
Rv0348
PBS	PBS_Start	PBS_End	ChiP.Peak.Height.Percentile	P_value
PBS_208-9	417255	417265	99.538	0
Rv0465c
PBS	PBS_Start	PBS_End	ChiP.Peak.Height.Percentile	P_value
PBS_70-1	1338535	1338548	85.529	3.98e-08
PBS_70-5	1338536	1338549	85.529	3.98e-08
PBS_70-6	1338747	1338760	85.529	3.98e-08
PBS_70-9	1338809	1338822	85.529	3.98e-08
PBS_70-11	1338810	1338823	85.529	3.98e-08
PBS_70-13	1338572	1338585	85.529	3.98e-08
PBS_138-3	1531074	1531084	82.687	0.00247707
PBS_138-45	1531288	1531298	82.687	0.00247707
PBS_138-50	1531228	1531238	82.687	0.00247707
PBS_138-53	1530970	1530980	82.687	0.00247707
PBS_63-11	1338922	1338931	85.529	0.00447159
PBS_63-31	1338714	1338723	85.529	0.00447159
PBS_63-50	1338767	1338776	85.529	0.00447159
PBS_63-66	1338563	1338572	85.529	0.00447159
PBS_204-8	2047367	2047376	88.039	0.00447159
PBS_204-13	2047452	2047461	88.039	0.00447159
PBS_112-12	1531223	1531231	82.687	0.012661
PBS_112-32	1531053	1531061	82.687	0.012661
PBS_112-54	1531294	1531302	82.687	0.012661
PBS_113-34	2029777	2029787	93.997	0.0197107
PBS_113-48	2029654	2029664	93.997	0.0197107
PBS_113-64	2029849	2029859	93.997	0.0197107
PBS_101-28	556351	556369	99.119	0.0197107
PBS_101-16	3505290	3505308	93.665	0.0197107
PBS_109-3	557300	557313	99.198	0.0197107
PBS_109-7	3505307	3505320	93.665	0.0197107
PBS_134-10	1338686	1338694	85.529	0.0197107
PBS_134-34	1338779	1338787	85.529	0.0197107
PBS_196-1	2096814	2096828	95.363	0.0197107
PBS_196-4	2096752	2096766	95.363	0.0197107
PBS_221-11	1530939	1530953	82.687	0.0197107
PBS_221-12	3505314	3505328	93.665	0.0197107
PBS_83-8	2047637	2047651	88.039	0.0197107
PBS_83-13	2047395	2047409	88.039	0.0197107
PBS_33-31	2029629	2029638	93.997	0.0224554
PBS_33-58	2029820	2029829	93.997	0.0224554
PBS_33-21	2786128	2786137	93.445	0.0224554
PBS_62-38	1531319	1531326	82.687	0.0224554
PBS_62-20	2046911	2046918	88.039	0.0224554
PBS_120-4	556416	556423	99.119	0.0244935
PBS_40-1	557455	557465	99.198	0.026569
PBS_40-19	557406	557416	99.198	0.026569
PBS_40-62	557498	557508	99.198	0.026569
PBS_226-15	3900471	3900483	85.909	0.031788
PBS_236-1	1338681	1338690	85.529	0.032014
PBS_236-29	1338774	1338783	85.529	0.032014
PBS_183-3	2785998	2786005	93.445	0.032014
PBS_212-12	1531317	1531325	82.687	0.032014
PBS_234-17	2029833	2029843	93.997	0.032014
PBS_225-11	1338690	1338703	85.529	0.040576
PBS_225-56	1338773	1338786	85.529	0.040576
PBS_132-2	3505294	3505308	93.665	0.040576
PBS_164-21	1531182	1531194	82.687	0.040576
PBS_176-15	2786443	2786452	93.445	0.0406442
PBS_224-17	2096731	2096738	95.363	0.0406442
PBS_213-9	1531184	1531191	82.687	0.0472421
PBS_248-9	2096853	2096874	95.363	0.0472421
Rv0494
PBS	PBS_Start	PBS_End	ChiP.Peak.Height.Percentile	P_value
PBS_201-11	3463947	3463957	95.318	3.31e-05
PBS_201-17	3463953	3463963	95.318	3.31e-05
PBS_126-23	3846223	3846233	81.134	0.00324741
PBS_136-4	3463953	3463963	95.318	0.00324741
PBS_171-30	2266787	2266799	98.362	0.00324741
PBS_173-15	3463919	3463928	95.318	0.00324741
PBS_196-37	3463943	3463957	95.318	0.00324741
PBS_236-42	3463956	3463965	95.318	0.00489398
PBS_52-50	3463923	3463933	95.318	0.00489398
PBS_17-23	3463897	3463907	95.318	0.0063546
PBS_73-34	3463946	3463953	95.318	0.0063546
PBS_74-51	3846182	3846189	81.134	0.0063546
PBS_78-46	3463904	3463911	95.318	0.0063546
PBS_93-36	3463955	3463965	95.318	0.0063546
PBS_15-114	3463941	3463955	95.318	0.0202115
PBS_6-97	2266788	2266798	98.362	0.024389
PBS_8-133	2266790	2266799	98.362	0.0259251
Rv0576
PBS	PBS_Start	PBS_End	ChiP.Peak.Height.Percentile	P_value
PBS_121-17	669800	669821	96.087	4.6e-05
PBS_121-19	669820	669841	96.087	4.6e-05
PBS_127-10	669806	669819	96.087	0.000340473
PBS_127-14	669822	669835	96.087	0.000340473
PBS_182-7	669770	669777	96.087	0.000842257
PBS_204-10	669750	669759	96.087	0.000842257
PBS_232-1	669792	669800	96.087	0.000842257
PBS_176-20	669802	669811	96.087	0.00112828
PBS_14-33	669759	669769	96.087	0.00127022
PBS_14-94	669752	669762	96.087	0.00127022
PBS_129-35	669749	669759	96.087	0.00131498
PBS_130-10	669748	669756	96.087	0.00131498
PBS_179-25	669759	669773	96.087	0.00131498
PBS_92-30	669826	669839	96.087	0.00131498
PBS_131-23	669824	669831	96.087	0.00138122
PBS_196-16	669808	669822	96.087	0.00138122
PBS_72-29	669804	669816	96.087	0.00503647
Rv0602c
PBS	PBS_Start	PBS_End	ChiP.Peak.Height.Percentile	P_value
PBS_88-4	2010587	2010596	84.85	0.000116573
PBS_108-14	2010567	2010574	84.85	0.000197613
PBS_48-89	2010571	2010578	84.85	0.000197613
Rv0653c
PBS	PBS_Start	PBS_End	ChiP.Peak.Height.Percentile	P_value
PBS_210-1	749976	749988	99.97	1.35e-05
PBS_210-3	749976	749988	99.97	1.35e-05
PBS_136-19	749973	749983	99.97	0.00129834
PBS_209-47	749944	749951	99.97	0.00245763
PBS_57-45	749956	749966	99.97	0.00245763
PBS_62-11	415002	415009	81.743	0.00245763
PBS_110-7	749932	749941	99.97	0.00300992
PBS_54-61	415035	415042	81.743	0.00300992
PBS_78-35	749931	749938	99.97	0.00300992
PBS_93-41	749952	749962	99.97	0.00304902
PBS_3-236	749947	749960	99.97	0.0282922
Rv0678
PBS	PBS_Start	PBS_End	ChiP.Peak.Height.Percentile	P_value
PBS_129-6	1547631	1547641	94.651	0.0330643
PBS_129-17	1547766	1547776	94.651	0.0330643
PBS_129-29	2046885	2046895	80.259	0.0330643
PBS_129-4	3214433	3214443	89.255	0.0330643
PBS_88-12	468065	468074	97.532	0.0367308
PBS_88-30	1253000	1253009	80.153	0.0367308
PBS_88-29	1547660	1547669	94.651	0.0367308
PBS_88-45	4263241	4263250	86.962	0.0367308
PBS_145-7	4185990	4186005	91.78	0.0367308
PBS_145-8	4185990	4186005	91.78	0.0367308
PBS_236-22	251694	251703	93.635	0.038127
PBS_236-32	251745	251754	93.635	0.038127
PBS_236-27	3464523	3464532	89.499	0.038127
PBS_236-50	4185915	4185924	91.78	0.038127
PBS_125-9	3214479	3214493	89.255	0.038127
PBS_125-20	3214542	3214556	89.255	0.038127
PBS_125-22	3214412	3214426	89.255	0.038127
PBS_204-8	2047367	2047376	81.14	0.038127
PBS_204-13	2047452	2047461	81.14	0.038127
PBS_223-8	1252983	1253001	80.153	0.038127
PBS_223-9	1547579	1547597	94.651	0.038127
Rv0691c
PBS	PBS_Start	PBS_End	ChiP.Peak.Height.Percentile	P_value
PBS_63-65	806279	806288	92.157	0.000551179
PBS_63-56	1642455	1642464	85.984	0.000551179
PBS_63-10	3283152	3283161	85.013	0.000551179
PBS_63-24	3283010	3283019	85.013	0.000551179
PBS_63-67	3282902	3282911	85.013	0.000551179
PBS_50-9	1061791	1061806	89.206	0.00314386
PBS_50-11	1061828	1061843	89.206	0.00314386
PBS_50-18	1061828	1061843	89.206	0.00314386
PBS_241-2	532221	532235	85.414	0.00314386
PBS_241-11	532263	532277	85.414	0.00314386
PBS_20-97	806298	806308	92.157	0.00483593
PBS_20-100	2123152	2123162	92.024	0.00483593
PBS_20-116	3464477	3464487	85.26	0.00483593
PBS_20-15	3586022	3586032	85.957	0.00483593
PBS_20-79	4329615	4329625	90.473	0.00483593
PBS_163-23	3283149	3283159	85.013	0.0155668
PBS_163-5	3586096	3586106	85.957	0.0155668
PBS_28-55	1117168	1117178	83.137	0.0355794
PBS_28-38	1642511	1642521	85.984	0.0355794
PBS_28-13	2604228	2604238	87.08	0.0355794
PBS_103-10	1417439	1417449	92.793	0.0355794
PBS_103-36	1417384	1417394	92.793	0.0355794
PBS_88-18	3283103	3283112	85.013	0.0355794
PBS_88-26	4405327	4405336	82.669	0.0355794
PBS_112-10	3282999	3283007	85.013	0.0419947
PBS_112-28	3283095	3283103	85.013	0.0419947
PBS_25-42	806299	806312	92.157	0.0419947
PBS_25-12	4329624	4329637	90.473	0.0419947
PBS_98-51	1417380	1417390	92.793	0.0465226
PBS_98-42	4405430	4405440	82.669	0.0465226
PBS_35-39	1642488	1642500	85.984	0.0478561
PBS_35-63	4405309	4405321	82.669	0.0478561
PBS_90-9	3586080	3586090	85.957	0.0478561
PBS_90-57	3586016	3586026	85.957	0.0478561
PBS_151-13	1417473	1417493	92.793	0.0478561
PBS_210-22	1417399	1417411	92.793	0.0478876
PBS_176-19	3464465	3464474	85.26	0.0487485
Rv0757
PBS	PBS_Start	PBS_End	ChiP.Peak.Height.Percentile	P_value
PBS_85-2	2684542	2684552	86.265	0.00210223
PBS_85-14	2684386	2684396	86.265	0.00210223
PBS_85-45	2684328	2684338	86.265	0.00210223
PBS_85-50	2684287	2684297	86.265	0.00210223
PBS_85-58	2684462	2684472	86.265	0.00210223
PBS_85-60	2684536	2684546	86.265	0.00210223
PBS_85-69	2684585	2684595	86.265	0.00210223
PBS_85-22	4062433	4062443	99.759	0.00210223
PBS_85-29	4062238	4062248	99.759	0.00210223
PBS_85-70	4062347	4062357	99.759	0.00210223
PBS_241-10	851549	851563	99.05	0.00249956
PBS_241-3	3500977	3500991	98.938	0.00249956
PBS_241-7	3907529	3907543	97.716	0.00249956
PBS_241-14	3907114	3907128	97.716	0.00249956
PBS_113-20	2684652	2684662	86.265	0.00346427
PBS_113-27	2684580	2684590	86.265	0.00346427
PBS_113-44	2684415	2684425	86.265	0.00346427
PBS_113-1	2692731	2692741	95.107	0.00346427
PBS_113-3	2692453	2692463	95.107	0.00346427
PBS_113-41	2692526	2692536	95.107	0.00346427
PBS_113-52	2692757	2692767	95.107	0.00346427
PBS_113-46	3232616	3232626	90.033	0.00346427
PBS_233-37	2684469	2684479	86.265	0.00346427
PBS_233-13	3907149	3907159	97.716	0.00346427
PBS_233-26	3907209	3907219	97.716	0.00346427
PBS_233-41	3907277	3907287	97.716	0.00346427
PBS_233-45	3907380	3907390	97.716	0.00346427
PBS_233-46	3907434	3907444	97.716	0.00346427
PBS_233-51	3907627	3907637	97.716	0.00346427
PBS_233-58	4062230	4062240	99.759	0.00346427
PBS_242-1	3834751	3834758	97.804	0.00346427
PBS_242-25	3834787	3834794	97.804	0.00346427
PBS_242-31	3834601	3834608	97.804	0.00346427
PBS_242-4	4062323	4062330	99.759	0.00346427
PBS_242-19	4062227	4062234	99.759	0.00346427
PBS_242-39	4062412	4062419	99.759	0.00346427
PBS_87-35	851567	851577	99.05	0.00346427
PBS_87-11	2684312	2684322	86.265	0.00346427
PBS_87-26	2684414	2684424	86.265	0.00346427
PBS_87-6	4062390	4062400	99.759	0.00346427
PBS_87-18	4062360	4062370	99.759	0.00346427
PBS_87-19	4062328	4062338	99.759	0.00346427
PBS_95-1	3232798	3232819	90.033	0.00890355
PBS_95-4	3232742	3232763	90.033	0.00890355
PBS_95-5	3232686	3232707	90.033	0.00890355
PBS_12-1	3232654	3232673	90.033	0.0140669
PBS_12-2	3232822	3232841	90.033	0.0140669
PBS_12-3	3232710	3232729	90.033	0.0140669
PBS_12-4	3232766	3232785	90.033	0.0140669
PBS_12-32	4062450	4062469	99.759	0.0140669
PBS_221-8	2603463	2603477	96.866	0.0219549
PBS_221-21	2603515	2603529	96.866	0.0219549
PBS_221-24	2603676	2603690	96.866	0.0219549
PBS_221-28	2603590	2603604	96.866	0.0219549
PBS_37-19	302675	302683	95.653	0.0240622
PBS_37-43	2692163	2692171	95.107	0.0240622
PBS_37-8	3834609	3834617	97.804	0.0240622
PBS_37-40	3834794	3834802	97.804	0.0240622
PBS_37-62	3834709	3834717	97.804	0.0240622
PBS_37-65	3834536	3834544	97.804	0.0240622
PBS_37-81	3834881	3834889	97.804	0.0240622
PBS_238-1	2684629	2684636	86.265	0.0240622
PBS_238-5	2684513	2684520	86.265	0.0240622
PBS_238-13	3501023	3501030	98.938	0.0240622
PBS_238-6	4338686	4338693	94.923	0.0240622
PBS_153-4	851533	851541	99.05	0.0240622
PBS_153-19	2910903	2910911	82.262	0.0240622
PBS_153-16	3022353	3022361	90.359	0.0240622
PBS_245-2	1708734	1708748	84.217	0.0294863
PBS_245-3	2692192	2692206	95.107	0.0294863
PBS_245-13	2692127	2692141	95.107	0.0294863
PBS_108-64	1163734	1163741	97.906	0.0318621
PBS_108-54	2684433	2684440	86.265	0.0318621
PBS_108-77	2684318	2684325	86.265	0.0318621
PBS_108-84	2684593	2684600	86.265	0.0318621
PBS_108-35	3079018	3079025	99.324	0.0318621
PBS_108-58	3079092	3079099	99.324	0.0318621
PBS_108-75	3079129	3079136	99.324	0.0318621
PBS_138-16	1313458	1313468	97.75	0.0320394
PBS_138-43	1325654	1325664	89.683	0.0320394
PBS_138-46	1327546	1327556	93.762	0.0320394
PBS_138-2	2603638	2603648	96.866	0.0320394
PBS_138-7	3500944	3500954	98.938	0.0320394
PBS_228-4	1708856	1708863	84.217	0.0388496
PBS_228-20	1708717	1708724	84.217	0.0388496
PBS_228-22	1708780	1708787	84.217	0.0388496
Rv0767c
PBS	PBS_Start	PBS_End	ChiP.Peak.Height.Percentile	P_value
PBS_4-16	860712	860726	90.326	0.0198373
PBS_4-92	860765	860779	90.326	0.0198373
PBS_4-104	860836	860850	90.326	0.0198373
PBS_4-114	3509636	3509650	81.978	0.0198373
PBS_9-62	860887	860896	90.326	0.0248398
PBS_9-68	860779	860788	90.326	0.0248398
PBS_9-53	1210519	1210528	85.375	0.0248398
PBS_154-19	860846	860855	90.326	0.0248398
PBS_193-3	3509547	3509561	81.978	0.0248398
PBS_197-5	860897	860910	90.326	0.0248398
PBS_205-13	2238003	2238013	83.372	0.0255035
PBS_224-11	4190574	4190581	80.841	0.0255035
PBS_137-24	3509576	3509585	81.978	0.0287977
PBS_59-12	3531167	3531176	80.036	0.0287977
PBS_36-35	1210574	1210584	85.375	0.03399
PBS_36-53	3509638	3509648	81.978	0.03399
PBS_181-29	1114249	1114259	84.488	0.03399
PBS_50-29	1210518	1210533	85.375	0.0346929
PBS_43-23	3509636	3509648	81.978	0.0438837
PBS_44-23	4190602	4190615	80.841	0.0438837
PBS_88-11	3531162	3531171	80.036	0.0438837
PBS_138-32	860895	860905	90.326	0.0475324
PBS_236-5	3531189	3531198	80.036	0.0475324
PBS_52-31	2473263	2473273	81.824	0.0475324
PBS_1-202	860714	860727	90.326	0.0495912
PBS_1-255	1210574	1210587	85.375	0.0495912
PBS_1-334	3509635	3509648	81.978	0.0495912
PBS_1-267	3531143	3531156	80.036	0.0495912
PBS_15-142	3509556	3509570	81.978	0.0495912
PBS_15-76	3547499	3547513	84.437	0.0495912
PBS_116-28	3547503	3547512	84.437	0.0495912
PBS_206-50	3509602	3509611	81.978	0.0495912
PBS_90-8	860716	860726	90.326	0.0495912
Rv0827c
PBS	PBS_Start	PBS_End	ChiP.Peak.Height.Percentile	P_value
PBS_149-4	2271763	2271774	98.633	0.000150975
PBS_189-39	2271810	2271820	98.633	0.000207349
PBS_209-12	2271849	2271856	98.633	0.000207349
PBS_62-30	2271854	2271861	98.633	0.000207349
PBS_116-8	2271813	2271822	98.633	0.000253593
Rv0880
PBS	PBS_Start	PBS_End	ChiP.Peak.Height.Percentile	P_value
PBS_135-13	1363431	1363442	91.795	0.000851149
PBS_178-18	1363448	1363458	91.795	0.000851149
PBS_18-2	1363439	1363460	91.795	0.000851149
PBS_247-18	2917845	2917859	92.317	0.000851149
PBS_50-20	2917738	2917753	92.317	0.00103897
PBS_242-17	2917786	2917793	92.317	0.00117049
PBS_53-8	2917818	2917828	92.317	0.00146682
PBS_90-62	1363366	1363376	91.795	0.00182148
PBS_73-67	1363371	1363378	91.795	0.00223812
PBS_72-45	1363365	1363377	91.795	0.00229615
PBS_1-365	1363363	1363376	91.795	0.049601
Rv0967
PBS	PBS_Start	PBS_End	ChiP.Peak.Height.Percentile	P_value
PBS_129-3	183540	183550	90.009	0.0084696
PBS_129-7	505046	505056	85.393	0.0084696
PBS_129-34	1076160	1076170	87.258	0.0084696
PBS_129-11	1300269	1300279	85.052	0.0084696
PBS_129-19	1300218	1300228	85.052	0.0084696
PBS_129-16	1895689	1895699	83.583	0.0084696
PBS_129-32	3282825	3282835	96.679	0.0084696
PBS_7-41	183582	183591	90.009	0.0319943
PBS_7-126	863186	863195	90.057	0.0319943
PBS_7-32	982720	982729	80.53	0.0319943
PBS_7-82	982708	982717	80.53	0.0319943
PBS_7-72	1026896	1026905	98.905	0.0319943
PBS_7-110	1300255	1300264	85.052	0.0319943
PBS_7-43	2136146	2136155	98.95	0.0319943
PBS_7-91	2136033	2136042	98.95	0.0319943
PBS_7-128	2135972	2135981	98.95	0.0319943
PBS_7-149	2144888	2144897	98.492	0.0319943
PBS_7-97	3226328	3226337	88.615	0.0319943
PBS_7-10	3638755	3638764	94.28	0.0319943
PBS_7-2	3804838	3804847	83.438	0.0319943
PBS_7-80	4149485	4149494	85.951	0.0319943
PBS_7-160	4222660	4222669	98.615	0.0319943
PBS_10-76	409280	409293	95.934	0.0319943
PBS_10-64	863183	863196	90.057	0.0319943
PBS_10-23	1895498	1895511	83.583	0.0319943
PBS_10-24	1895384	1895397	83.583	0.0319943
PBS_10-25	1895441	1895454	83.583	0.0319943
PBS_10-30	1895555	1895568	83.583	0.0319943
PBS_10-70	2263073	2263086	86.588	0.0319943
PBS_10-80	2906790	2906803	81.562	0.0319943
PBS_10-72	4099404	4099417	99.297	0.0319943
PBS_249-33	183604	183613	90.009	0.0319943
PBS_249-12	2055522	2055531	87.324	0.0319943
PBS_249-21	2055461	2055470	87.324	0.0319943
PBS_249-8	2263204	2263213	86.588	0.0319943
PBS_249-2	3895752	3895761	94.627	0.0319943
PBS_249-31	3895629	3895638	94.627	0.0319943
PBS_163-18	408600	408610	80.259	0.0319943
PBS_163-17	1241472	1241482	86.063	0.0319943
PBS_163-7	2135973	2135983	98.95	0.0319943
PBS_163-12	3282746	3282756	96.679	0.0319943
PBS_163-27	3282858	3282868	96.679	0.0319943
PBS_170-23	53250	53258	92.721	0.0319943
PBS_170-14	1580499	1580507	84.024	0.0319943
PBS_170-7	2453764	2453772	97.318	0.0319943
PBS_170-22	2453632	2453640	97.318	0.0319943
PBS_170-24	2453518	2453526	97.318	0.0319943
PBS_162-9	2136092	2136112	98.95	0.0319943
PBS_162-2	3226335	3226355	88.615	0.0319943
PBS_162-8	3226329	3226349	88.615	0.0319943
PBS_17-64	408617	408627	80.259	0.0460996
PBS_17-55	982745	982755	80.53	0.0460996
PBS_17-11	1895556	1895566	83.583	0.0460996
PBS_17-12	1895499	1895509	83.583	0.0460996
PBS_17-13	1895385	1895395	83.583	0.0460996
PBS_17-15	1895442	1895452	83.583	0.0460996
PBS_17-48	1972113	1972123	90.422	0.0460996
PBS_17-56	1971998	1972008	90.422	0.0460996
Rv1033c
PBS	PBS_Start	PBS_End	ChiP.Peak.Height.Percentile	P_value
PBS_249-6	659345	659354	91.951	0.00312338
PBS_249-14	1158771	1158780	99.771	0.00312338
PBS_249-23	1158804	1158813	99.771	0.00312338
PBS_249-25	1158878	1158887	99.771	0.00312338
PBS_249-11	4062426	4062435	99.958	0.00312338
PBS_249-22	4212000	4212009	93.596	0.00312338
PBS_249-29	4211954	4211963	93.596	0.00312338
PBS_221-8	2603463	2603477	80.708	0.00312338
PBS_221-21	2603515	2603529	80.708	0.00312338
PBS_221-24	2603676	2603690	80.708	0.00312338
PBS_221-28	2603590	2603604	80.708	0.00312338
PBS_221-31	2634103	2634117	88.054	0.00312338
PBS_221-25	4276504	4276518	86.371	0.00312338
Rv1049
PBS	PBS_Start	PBS_End	ChiP.Peak.Height.Percentile	P_value
PBS_35-28	781476	781488	80.171	0.00146554
PBS_35-60	784641	784653	84.476	0.00146554
PBS_35-48	4129248	4129260	94.884	0.00146554
PBS_21-16	3051531	3051548	81.076	0.00146554
PBS_21-19	3051531	3051548	81.076	0.00146554
PBS_125-9	3214479	3214493	85.019	0.00147449
PBS_125-20	3214542	3214556	85.019	0.00147449
PBS_179-10	781425	781439	80.171	0.00147449
PBS_179-13	784797	784811	84.476	0.00147449
PBS_14-13	4054713	4054723	85.918	0.00377553
PBS_14-82	4055147	4055157	85.918	0.00377553
PBS_14-126	4054792	4054802	85.918	0.00377553
PBS_117-6	1426149	1426156	83.119	0.00377553
PBS_117-24	4198190	4198197	80.913	0.00377553
PBS_207-8	4198671	4198686	81.876	0.00377553
PBS_239-6	3051490	3051501	81.076	0.00377553
PBS_233-39	4055184	4055194	85.918	0.00550635
PBS_233-61	4054798	4054808	85.918	0.00550635
PBS_155-5	4129200	4129210	94.884	0.00598434
PBS_13-42	3214601	3214619	85.019	0.00684241
PBS_13-27	4129155	4129173	94.884	0.00684241
PBS_32-39	3051543	3051553	81.076	0.00836154
PBS_32-19	4198662	4198672	81.876	0.00836154
PBS_137-26	4129249	4129258	94.884	0.00836154
PBS_139-22	4198187	4198194	80.913	0.00836154
PBS_213-2	4129176	4129183	94.884	0.00836154
PBS_129-4	3214433	3214443	85.019	0.011341
PBS_144-33	3214444	3214458	85.019	0.0212803
PBS_15-146	4198169	4198183	80.913	0.0229824
PBS_15-101	4198667	4198681	81.876	0.0229824
PBS_80-50	781390	781400	80.171	0.0236311
PBS_90-53	781348	781358	80.171	0.0272154
PBS_67-50	3214436	3214446	85.019	0.0325418
PBS_73-44	4129158	4129165	94.884	0.0335871
PBS_37-58	3214480	3214488	85.019	0.0398959
PBS_85-16	3051440	3051450	81.076	0.0398959
Rv1167c
PBS	PBS_Start	PBS_End	ChiP.Peak.Height.Percentile	P_value
PBS_129-11	1300269	1300279	99.363	3.42e-06
PBS_129-19	1300218	1300228	99.363	3.42e-06
PBS_129-11	1300269	1300279	95.846	3.42e-06
PBS_129-19	1300218	1300228	95.846	3.42e-06
PBS_180-5	806173	806187	94.172	4e-05
PBS_180-5	806173	806187	86.678	4e-05
PBS_19-11	806173	806194	94.172	0.000541953
PBS_19-11	806173	806194	86.678	0.000541953
PBS_18-13	806210	806231	94.172	0.000664352
PBS_18-13	806210	806231	86.678	0.000664352
PBS_221-23	1300210	1300224	99.363	0.000808279
PBS_221-23	1300210	1300224	95.846	0.000808279
PBS_219-30	1300128	1300138	99.363	0.000889704
PBS_219-30	1300128	1300138	95.846	0.000889704
PBS_227-42	1300135	1300145	99.363	0.00164442
PBS_227-42	1300135	1300145	95.846	0.00164442
PBS_25-42	806299	806312	94.172	0.00248616
PBS_25-42	806299	806312	86.678	0.00248616
PBS_35-24	806191	806203	94.172	0.00381965
PBS_35-24	806191	806203	86.678	0.00381965
PBS_63-65	806279	806288	94.172	0.00404252
PBS_63-65	806279	806288	86.678	0.00404252
PBS_67-48	806181	806191	94.172	0.00404252
PBS_67-48	806181	806191	86.678	0.00404252
PBS_3-64	1300288	1300301	99.363	0.00464452
PBS_3-147	1300222	1300235	99.363	0.00464452
PBS_3-64	1300288	1300301	95.846	0.00464452
PBS_3-147	1300222	1300235	95.846	0.00464452
PBS_13-46	1300187	1300205	99.363	0.00497625
PBS_13-46	1300187	1300205	95.846	0.00497625
PBS_33-60	806289	806298	94.172	0.00497625
PBS_33-60	806289	806298	86.678	0.00497625
PBS_66-48	1300218	1300228	99.363	0.00497625
PBS_66-48	1300218	1300228	95.846	0.00497625
PBS_16-36	806169	806179	94.172	0.013396
PBS_16-36	806169	806179	86.678	0.013396
PBS_20-97	806298	806308	94.172	0.0140405
PBS_20-97	806298	806308	86.678	0.0140405
PBS_1-164	1300223	1300236	99.363	0.0196082
PBS_1-388	1300277	1300290	99.363	0.0196082
PBS_1-164	1300223	1300236	95.846	0.0196082
PBS_1-388	1300277	1300290	95.846	0.0196082
PBS_7-110	1300255	1300264	99.363	0.0234529
PBS_7-110	1300255	1300264	95.846	0.0234529
PBS_6-157	806174	806184	94.172	0.0260197
PBS_6-157	806174	806184	86.678	0.0260197
Rv1176c
PBS	PBS_Start	PBS_End	ChiP.Peak.Height.Percentile	P_value
PBS_82-1	1308822	1308829	98.727	1.22e-05
PBS_82-24	1308883	1308890	98.727	1.22e-05
PBS_17-20	1308989	1308999	98.727	0.00140846
PBS_31-57	1308931	1308949	98.727	0.00140846
PBS_54-53	1308904	1308911	98.727	0.00140846
PBS_27-11	1308796	1308803	98.727	0.001994
PBS_3-145	1308795	1308808	98.727	0.00877549
Rv1219c
PBS	PBS_Start	PBS_End	ChiP.Peak.Height.Percentile	P_value
PBS_180-1	1363483	1363497	99.991	0.00028465
PBS_135-13	1363431	1363442	99.991	0.000567433
PBS_178-18	1363448	1363458	99.991	0.000567433
PBS_18-2	1363439	1363460	99.991	0.000567433
PBS_19-5	1363476	1363497	99.991	0.000567433
PBS_232-14	1197119	1197127	84.337	0.000567433
PBS_90-62	1363366	1363376	99.991	0.00208169
PBS_73-67	1363371	1363378	99.991	0.00251788
PBS_72-45	1363365	1363377	99.991	0.00255128
PBS_32-90	1363478	1363488	99.991	0.00345629
PBS_1-365	1363363	1363376	99.991	0.049601
Rv1255c
PBS	PBS_Start	PBS_End	ChiP.Peak.Height.Percentile	P_value
PBS_142-20	3632012	3632022	95.508	0.000735251
PBS_151-8	3632017	3632037	95.508	0.000735251
PBS_158-1	3632072	3632082	95.508	0.000735251
PBS_61-1	1404663	1404673	99.623	0.00124848
PBS_80-12	1404688	1404698	99.623	0.00177567
PBS_46-32	3632053	3632062	95.508	0.00257517
PBS_37-39	3631997	3632005	95.508	0.00283651
PBS_79-88	1404705	1404715	99.623	0.00284408
PBS_23-79	1404614	1404624	99.623	0.0030502
PBS_16-64	3632069	3632079	95.508	0.00420212
Rv1404
PBS	PBS_Start	PBS_End	ChiP.Peak.Height.Percentile	P_value
PBS_85-2	2684542	2684552	99.581	0.000210137
PBS_85-14	2684386	2684396	99.581	0.000210137
PBS_85-45	2684328	2684338	99.581	0.000210137
PBS_85-50	2684287	2684297	99.581	0.000210137
PBS_85-58	2684462	2684472	99.581	0.000210137
PBS_85-60	2684536	2684546	99.581	0.000210137
PBS_85-69	2684585	2684595	99.581	0.000210137
PBS_85-37	3381100	3381110	99.861	0.000210137
PBS_85-67	4057265	4057275	99.644	0.000210137
PBS_74-2	1730	1737	84.953	0.00276003
PBS_74-49	1906	1913	84.953	0.00276003
PBS_74-75	1881	1888	84.953	0.00276003
PBS_74-20	543149	543156	93.731	0.00276003
PBS_74-22	1580436	1580443	97.46	0.00276003
PBS_74-16	1582008	1582015	99.732	0.00276003
PBS_74-68	3968986	3968993	99.894	0.00276003
PBS_87-16	1581978	1581988	99.732	0.00276003
PBS_87-11	2684312	2684322	99.581	0.00276003
PBS_87-26	2684414	2684424	99.581	0.00276003
PBS_87-5	4196645	4196655	99.496	0.00276003
PBS_87-38	4196581	4196591	99.496	0.00276003
PBS_121-17	669800	669821	95.575	0.0153378
PBS_121-19	669820	669841	95.575	0.0153378
PBS_121-20	2684515	2684536	99.581	0.0153378
PBS_203-13	3381133	3381140	99.861	0.0207405
PBS_203-6	4338536	4338543	96.265	0.0207405
PBS_203-15	4338838	4338845	96.265	0.0207405
PBS_203-37	4338699	4338706	96.265	0.0207405
PBS_190-11	2684482	2684494	99.581	0.0258477
PBS_190-24	2684315	2684327	99.581	0.0258477
PBS_190-13	4196513	4196525	99.496	0.0258477
PBS_202-9	3969205	3969218	99.894	0.0258477
PBS_202-12	3969136	3969149	99.894	0.0258477
PBS_202-19	3969284	3969297	99.894	0.0258477
PBS_238-1	2684629	2684636	99.581	0.0368882
PBS_238-5	2684513	2684520	99.581	0.0368882
PBS_238-6	4338686	4338693	96.265	0.0368882
PBS_129-35	669749	669759	95.575	0.0408247
PBS_129-6	1547631	1547641	99.529	0.0408247
PBS_129-17	1547766	1547776	99.529	0.0408247
PBS_22-11	230530	230537	98.932	0.045199
PBS_22-29	230475	230482	98.932	0.045199
PBS_22-42	230768	230775	98.932	0.045199
PBS_22-90	230588	230595	98.932	0.045199
PBS_22-104	230687	230694	98.932	0.045199
PBS_22-81	1547547	1547554	99.529	0.045199
PBS_222-2	1580551	1580561	97.46	0.045199
PBS_222-4	1580504	1580514	97.46	0.045199
PBS_222-37	1934024	1934034	92.148	0.045199
Rv1423
PBS	PBS_Start	PBS_End	ChiP.Peak.Height.Percentile	P_value
PBS_35-14	888732	888744	93.581	2.6e-07
PBS_35-26	1069807	1069819	80.304	2.6e-07
PBS_35-39	1642488	1642500	81.514	2.6e-07
PBS_35-30	1836934	1836946	85.324	2.6e-07
PBS_35-37	2562508	2562520	82.892	2.6e-07
PBS_35-12	2759688	2759700	94.018	2.6e-07
PBS_35-10	3571244	3571256	94.796	2.6e-07
PBS_35-41	3571251	3571263	94.796	2.6e-07
PBS_61-4	183254	183264	82.524	2.6e-07
PBS_61-5	625522	625532	85.101	2.6e-07
PBS_61-1	1404663	1404673	90.075	2.6e-07
PBS_61-10	1836936	1836946	85.324	2.6e-07
PBS_61-6	2840070	2840080	84.235	2.6e-07
PBS_61-40	2840028	2840038	84.235	2.6e-07
PBS_61-17	3412039	3412049	90.691	2.6e-07
PBS_18-15	183232	183253	82.524	0.00256078
PBS_18-20	888713	888734	93.581	0.00256078
PBS_18-27	888856	888877	93.581	0.00256078
PBS_209-44	3347916	3347923	92.132	0.011007
PBS_209-7	3412077	3412084	90.691	0.011007
PBS_209-9	4375702	4375709	85.3	0.011007
PBS_154-14	888688	888697	93.581	0.011007
PBS_154-15	888889	888898	93.581	0.011007
PBS_166-19	2759587	2759597	94.018	0.011007
PBS_166-21	2759762	2759772	94.018	0.011007
PBS_19-13	183269	183290	82.524	0.011007
PBS_19-18	888714	888735	93.581	0.011007
PBS_212-5	1069791	1069799	80.304	0.011007
PBS_212-8	3412064	3412072	90.691	0.011007
PBS_224-7	1836862	1836869	85.324	0.011007
PBS_224-20	1836907	1836914	85.324	0.011007
PBS_98-12	183289	183299	82.524	0.0135
PBS_98-8	2759763	2759773	94.018	0.0135
PBS_98-35	2984696	2984706	84.081	0.0135
PBS_21-16	3051531	3051548	94.238	0.0135
PBS_21-19	3051531	3051548	94.238	0.0135
PBS_133-3	2839984	2840005	84.235	0.0175933
PBS_172-20	2840102	2840111	84.235	0.0357492
PBS_172-27	2984694	2984703	84.081	0.0357492
PBS_239-6	3051490	3051501	94.238	0.0369675
PBS_96-13	3545419	3545429	85.218	0.0395683
PBS_193-5	1069832	1069846	80.304	0.0396575
PBS_217-6	3411991	3412005	90.691	0.0396575
PBS_197-2	1836836	1836849	85.324	0.0471743
PBS_15-6	625511	625525	85.101	0.0497521
PBS_15-68	1069826	1069840	80.304	0.0497521
PBS_15-136	1836850	1836864	85.324	0.0497521
PBS_15-2	3347931	3347945	92.132	0.0497521
Rv1556
PBS	PBS_Start	PBS_End	ChiP.Peak.Height.Percentile	P_value
PBS_15-15	1761695	1761709	99.004	8.57e-05
PBS_15-102	1761632	1761646	99.004	8.57e-05
PBS_15-117	1760948	1760962	99.004	8.57e-05
PBS_131-2	1761650	1761657	99.004	8.57e-05
PBS_131-4	1760963	1760970	99.004	8.57e-05
PBS_20-63	1761658	1761668	99.004	0.0010924
PBS_20-94	1760960	1760970	99.004	0.0010924
PBS_128-18	1760943	1760957	99.004	0.00138952
PBS_203-14	1760987	1760994	99.004	0.00188885
PBS_236-12	1760936	1760945	99.004	0.00247671
PBS_33-7	1761726	1761735	99.004	0.0049545
PBS_14-15	1761704	1761714	99.004	0.00975709
PBS_1-60	1761709	1761722	99.004	0.0100643
PBS_1-358	1760959	1760972	99.004	0.0100643
Rv1657
PBS	PBS_Start	PBS_End	ChiP.Peak.Height.Percentile	P_value
PBS_67-12	1865485	1865495	94.087	0.00166974
PBS_67-62	1865435	1865445	94.087	0.00166974
PBS_145-10	1865465	1865480	94.087	0.00166974
PBS_22-14	1865432	1865439	94.087	0.00237325
PBS_22-47	1865398	1865405	94.087	0.00237325
PBS_123-26	1865450	1865464	94.087	0.00237325
PBS_151-7	1865516	1865536	94.087	0.00237325
PBS_178-1	1865473	1865483	94.087	0.00237325
PBS_190-5	1865536	1865548	94.087	0.00237325
PBS_71-13	1865486	1865507	94.087	0.00237325
PBS_238-27	1865445	1865452	94.087	0.00255312
PBS_144-14	1865426	1865440	94.087	0.0052439
PBS_91-4	1865410	1865420	94.087	0.00821902
PBS_55-59	1865412	1865419	94.087	0.00868616
PBS_29-57	1865522	1865529	94.087	0.00868966
PBS_26-70	1865430	1865439	94.087	0.010078
PBS_48-83	1865453	1865460	94.087	0.0137177
PBS_8-159	1865411	1865420	94.087	0.0395795
Rv1675c
PBS	PBS_Start	PBS_End	ChiP.Peak.Height.Percentile	P_value
PBS_111-31	4405233	4405240	93.698	0.000730371
PBS_130-2	1901014	1901022	85.825	0.000730371
PBS_132-17	1901003	1901017	85.825	0.000730371
PBS_214-19	1900989	1901002	85.825	0.000730371
PBS_229-5	1901012	1901019	85.825	0.000730371
PBS_246-16	4405173	4405186	93.698	0.000730371
PBS_88-26	4405327	4405336	93.698	0.00109887
PBS_98-42	4405430	4405440	93.698	0.00159533
PBS_35-63	4405309	4405321	93.698	0.00172444
PBS_14-41	1901018	1901028	85.825	0.00588254
PBS_7-125	1901032	1901041	85.825	0.00870231
Rv1719
PBS	PBS_Start	PBS_End	ChiP.Peak.Height.Percentile	P_value
PBS_246-7	4408320	4408333	95.68	1.34e-05
PBS_246-14	4408212	4408225	95.68	1.34e-05
PBS_246-17	4408268	4408281	95.68	1.34e-05
PBS_180-6	786971	786985	84.006	0.00873698
PBS_138-20	518400	518410	93.098	0.00931845
PBS_138-30	518486	518496	93.098	0.00931845
PBS_206-45	1941746	1941755	99.81	0.00931845
PBS_206-59	1941814	1941823	99.81	0.00931845
PBS_207-11	787052	787067	84.006	0.00931845
PBS_241-4	787073	787087	84.006	0.00931845
PBS_45-85	1941759	1941768	99.81	0.0151882
PBS_45-11	2894437	2894446	81.366	0.0151882
PBS_136-1	787051	787061	84.006	0.0151882
PBS_19-17	786971	786992	84.006	0.0151882
PBS_228-2	1941833	1941840	99.81	0.0151882
PBS_163-10	1941699	1941709	99.81	0.0154711
PBS_229-28	2894498	2894505	81.366	0.0154711
PBS_59-16	4099284	4099293	93.795	0.0154711
PBS_130-26	2894487	2894495	81.366	0.0163051
PBS_181-20	1941730	1941740	99.81	0.0181296
PBS_161-24	2894418	2894430	81.366	0.0232723
PBS_227-10	1941692	1941702	99.81	0.0232723
PBS_61-36	518529	518539	93.098	0.0232723
PBS_88-21	4408247	4408256	95.68	0.0232723
PBS_11-8	787046	787060	84.006	0.0240301
PBS_189-38	787064	787074	84.006	0.0257562
PBS_127-36	787058	787071	84.006	0.0274661
PBS_98-36	4408304	4408314	95.68	0.0311553
PBS_4-30	787066	787080	84.006	0.0317006
PBS_4-149	786955	786969	84.006	0.0317006
PBS_116-49	1941745	1941754	99.81	0.0331537
PBS_35-1	786989	787001	84.006	0.0331537
PBS_2-37	518413	518432	93.098	0.0373444
PBS_233-60	787072	787082	84.006	0.0373444
PBS_75-48	2894490	2894497	81.366	0.038923
PBS_10-32	518442	518455	93.098	0.04202
PBS_74-56	9830	9837	98.377	0.04202
PBS_33-22	4099284	4099293	93.795	0.0431502
PBS_37-9	3017810	3017818	88.727	0.0431502
Rv1773c
PBS	PBS_Start	PBS_End	ChiP.Peak.Height.Percentile	P_value
PBS_72-15	2007784	2007796	96.136	0.000352975
PBS_22-71	2007804	2007811	96.136	0.000384467
PBS_8-144	2007775	2007784	96.136	0.000655848
Rv1816
PBS	PBS_Start	PBS_End	ChiP.Peak.Height.Percentile	P_value
PBS_138-36	193577	193587	99.101	0.041891
PBS_138-44	1247059	1247069	81.607	0.041891
PBS_138-18	4099635	4099645	84.428	0.041891
PBS_138-15	4137163	4137173	90.887	0.041891
PBS_2-47	733610	733629	97.101	0.041891
PBS_2-14	863164	863183	98.277	0.041891
PBS_2-12	3319639	3319658	97.928	0.041891
PBS_2-19	3319540	3319559	97.928	0.041891
PBS_33-1	400108	400117	84.063	0.041891
PBS_33-16	400157	400166	84.063	0.041891
PBS_33-82	400089	400098	84.063	0.041891
PBS_33-79	1108511	1108520	95.415	0.041891
PBS_58-57	759630	759643	90.724	0.041891
PBS_58-58	759573	759586	90.724	0.041891
PBS_58-27	2313104	2313117	86.22	0.041891
PBS_58-20	4121900	4121913	81.571	0.041891
PBS_127-32	385952	385965	85.101	0.041891
PBS_127-10	669806	669819	93.958	0.041891
PBS_127-14	669822	669835	93.958	0.041891
PBS_156-13	419619	419632	99.614	0.041891
PBS_156-15	419767	419780	99.614	0.041891
PBS_156-42	419695	419708	99.614	0.041891
PBS_181-4	385971	385981	85.101	0.041891
PBS_181-33	386066	386076	85.101	0.041891
PBS_181-34	1247064	1247074	81.607	0.041891
PBS_189-2	2338698	2338708	82.096	0.041891
PBS_189-27	2338602	2338612	82.096	0.041891
PBS_189-9	3319563	3319573	97.928	0.041891
PBS_121-17	669800	669821	93.958	0.041891
PBS_121-19	669820	669841	93.958	0.041891
PBS_21-5	400159	400176	84.063	0.041891
PBS_21-11	400159	400176	84.063	0.041891
PBS_228-9	4137120	4137127	90.887	0.041891
PBS_228-17	4137191	4137198	90.887	0.041891
PBS_229-7	2338670	2338677	82.096	0.041891
PBS_229-19	4137151	4137158	90.887	0.041891
PBS_64-6	863187	863208	98.277	0.041891
PBS_64-5	3319590	3319611	97.928	0.041891
PBS_133-5	863205	863226	98.277	0.041891
PBS_59-4	400108	400117	84.063	0.042743
PBS_59-22	400157	400166	84.063	0.042743
Rv1846c
PBS	PBS_Start	PBS_End	ChiP.Peak.Height.Percentile	P_value
PBS_28-28	1459691	1459701	97.891	0.00339675
PBS_28-38	1642511	1642521	95.909	0.00339675
PBS_217-4	2326903	2326917	93.104	0.00339675
PBS_195-15	2326897	2326911	93.104	0.0038411
PBS_21-23	1459710	1459727	97.891	0.0038411
PBS_15-30	2326886	2326900	93.104	0.00442375
PBS_15-103	2326810	2326824	93.104	0.00442375
PBS_174-18	2326887	2326904	93.104	0.00442375
PBS_68-21	1642503	1642510	95.909	0.00442375
PBS_172-8	2326852	2326861	93.104	0.00442621
PBS_44-15	1459527	1459540	97.891	0.00515661
PBS_116-33	2326928	2326937	93.104	0.00709473
PBS_188-44	1642495	1642507	95.909	0.00709473
PBS_35-39	1642488	1642500	95.909	0.00709473
PBS_63-56	1642455	1642464	95.909	0.00737148
PBS_93-35	1642464	1642474	95.909	0.00893651
PBS_36-66	1642443	1642453	95.909	0.0142416
PBS_41-7	2326874	2326883	93.104	0.0151348
PBS_34-11	2326853	2326867	93.104	0.0160153
PBS_6-171	1459514	1459524	97.891	0.0310872
Rv1956
PBS	PBS_Start	PBS_End	ChiP.Peak.Height.Percentile	P_value
PBS_188-52	1008185	1008197	82.401	2.01e-06
PBS_188-18	1842425	1842437	87.309	2.01e-06
PBS_188-31	1842306	1842318	87.309	2.01e-06
PBS_188-50	1842256	1842268	87.309	2.01e-06
PBS_69-16	1842394	1842402	87.309	0.000246585
PBS_69-23	1842336	1842344	87.309	0.000246585
PBS_110-51	1842422	1842431	87.309	0.00132566
PBS_110-61	1842334	1842343	87.309	0.00132566
PBS_78-39	1842401	1842408	87.309	0.00146728
PBS_78-61	1842272	1842279	87.309	0.00146728
PBS_205-20	1008183	1008193	82.401	0.00285812
PBS_50-25	1842371	1842386	87.309	0.00616659
PBS_102-3	1842275	1842284	87.309	0.00651512
PBS_211-29	1008187	1008197	82.401	0.00651512
PBS_237-15	1008192	1008204	82.401	0.008041
PBS_90-26	1008186	1008196	82.401	0.0101992
PBS_93-4	1842405	1842415	87.309	0.0144487
PBS_26-21	1008182	1008191	82.401	0.0149205
PBS_3-90	1008191	1008204	82.401	0.0169153
PBS_3-188	1008183	1008196	82.401	0.0169153
PBS_20-95	1008181	1008191	82.401	0.0289701
PBS_1-179	1008190	1008203	82.401	0.0467849
PBS_1-292	1842403	1842416	87.309	0.0467849
PBS_8-21	1842406	1842415	87.309	0.0491727
Rv1985c
PBS	PBS_Start	PBS_End	ChiP.Peak.Height.Percentile	P_value
PBS_137-2	3559241	3559250	91.921	0.000855902
PBS_137-12	3559293	3559302	91.921	0.000855902
PBS_149-12	2229977	2229988	98.893	0.0115084
PBS_150-28	3559304	3559313	91.921	0.0115084
PBS_158-18	2229908	2229918	98.893	0.0115084
PBS_65-6	2229996	2230009	98.893	0.0115084
PBS_222-22	2229913	2229923	98.893	0.0123065
PBS_83-27	2229979	2229993	98.893	0.0123065
PBS_227-18	3559365	3559375	91.921	0.0133481
PBS_88-19	2229962	2229971	98.893	0.0133481
PBS_4-139	2229942	2229956	98.893	0.0134195
PBS_4-145	2229994	2230008	98.893	0.0134195
PBS_189-4	2229913	2229923	98.893	0.0134195
PBS_230-31	3559367	3559374	91.921	0.0151521
PBS_80-33	2229950	2229960	98.893	0.0151521
PBS_188-2	2229993	2230005	98.893	0.0170165
PBS_38-45	2229904	2229918	98.893	0.0191675
PBS_73-53	2229927	2229934	98.893	0.0191675
PBS_79-79	2229959	2229969	98.893	0.0268497
PBS_32-3	3559379	3559389	91.921	0.028195
PBS_39-39	3559444	3559452	91.921	0.028195
PBS_22-65	3559263	3559270	91.921	0.0354738
PBS_34-73	2229919	2229933	98.893	0.0354738
PBS_14-22	3559275	3559285	91.921	0.0388087
Rv1990c
PBS	PBS_Start	PBS_End	ChiP.Peak.Height.Percentile	P_value
PBS_170-15	3620584	3620592	81.987	0.00472269
PBS_170-9	3621466	3621474	83.604	0.00472269
PBS_116-11	3547399	3547408	86.657	0.0110893
PBS_116-28	3547503	3547512	86.657	0.0110893
PBS_91-20	1107398	1107408	87.894	0.0110893
PBS_91-47	1107417	1107427	87.894	0.0110893
PBS_76-4	124343	124363	82.723	0.0110893
PBS_136-20	1107410	1107420	87.894	0.013359
PBS_195-1	3620584	3620598	81.987	0.013359
PBS_70-21	124335	124348	82.723	0.013359
PBS_142-25	124350	124360	82.723	0.0141113
PBS_152-16	3620567	3620574	81.987	0.0141113
PBS_65-29	3620532	3620545	81.987	0.0155253
PBS_179-27	3620595	3620609	81.987	0.0169211
PBS_185-23	3568721	3568728	89.659	0.017346
PBS_131-25	124321	124328	82.723	0.018715
PBS_49-27	3620582	3620602	81.987	0.0204915
PBS_97-36	2233646	2233656	97.653	0.0204915
PBS_43-2	3620575	3620587	81.987	0.0218151
PBS_15-76	3547499	3547513	86.657	0.0244985
PBS_15-14	3620578	3620592	81.987	0.0244985
PBS_25-47	3620556	3620569	81.987	0.0244985
PBS_80-1	2233806	2233816	97.653	0.0256841
PBS_4-119	3620573	3620587	81.987	0.0257572
PBS_4-15	3621468	3621482	83.604	0.0257572
PBS_225-14	3547356	3547369	86.657	0.0268991
PBS_90-46	1107424	1107434	87.894	0.0268991
PBS_63-9	3620582	3620591	81.987	0.0306108
PBS_55-36	3621540	3621547	83.604	0.0318021
PBS_74-31	3620586	3620593	81.987	0.0372289
PBS_37-59	2233773	2233781	97.653	0.0386003
PBS_85-65	3620569	3620579	81.987	0.0386003
PBS_32-95	3620559	3620569	81.987	0.0474955
PBS_23-90	3547564	3547574	86.657	0.0484828
Rv1994c
PBS	PBS_Start	PBS_End	ChiP.Peak.Height.Percentile	P_value
PBS_27-36	2238004	2238011	99.587	0.000694177
PBS_27-78	2238100	2238107	99.587	0.000694177
PBS_158-14	3550165	3550175	83.137	0.000694177
PBS_205-13	2238003	2238013	99.587	0.000694177
PBS_208-18	3550205	3550215	83.137	0.000694177
PBS_8-23	2238106	2238115	99.587	0.00129659
PBS_8-75	2238005	2238014	99.587	0.00129659
PBS_138-22	3550191	3550201	83.137	0.0020071
PBS_47-41	2238079	2238092	99.587	0.00287839
PBS_93-6	3550223	3550233	83.137	0.00311832
PBS_22-61	3550187	3550194	83.137	0.00593081
PBS_5-150	2237991	2238001	99.587	0.00927653
Rv2021c
PBS	PBS_Start	PBS_End	ChiP.Peak.Height.Percentile	P_value
PBS_248-14	3177481	3177502	81.097	0.00100535
PBS_248-18	3177486	3177507	81.097	0.00100535
PBS_20-29	3905747	3905757	81.399	0.00348592
PBS_20-54	3905687	3905697	81.399	0.00348592
PBS_20-103	3905591	3905601	81.399	0.00348592
PBS_93-17	3905679	3905689	81.399	0.00682611
PBS_93-44	3905596	3905606	81.399	0.00682611
PBS_244-4	3177517	3177528	81.097	0.00682611
PBS_250-18	4252931	4252942	92.92	0.00682611
PBS_32-64	3905581	3905591	81.399	0.00728038
PBS_32-69	3905690	3905700	81.399	0.00728038
PBS_34-52	3905581	3905595	81.399	0.00739544
PBS_34-85	3905677	3905691	81.399	0.00739544
PBS_111-12	3177438	3177445	81.097	0.00739544
PBS_126-5	3905726	3905736	81.399	0.00739544
PBS_146-14	3905591	3905605	81.399	0.00739544
PBS_160-10	3905589	3905598	81.399	0.00739544
PBS_68-19	3905739	3905746	81.399	0.00801041
PBS_144-3	3905568	3905582	81.399	0.0116852
PBS_237-39	3177517	3177529	81.097	0.0116852
PBS_82-29	3905621	3905628	81.399	0.0116852
PBS_94-8	3905713	3905721	81.399	0.0116852
PBS_80-9	3905574	3905584	81.399	0.0126935
PBS_58-41	4252925	4252938	92.92	0.0236996
PBS_30-68	3905640	3905654	81.399	0.0316068
PBS_23-24	3905710	3905720	81.399	0.0317948
PBS_41-48	4252955	4252964	92.92	0.0367914
Rv2034
PBS	PBS_Start	PBS_End	ChiP.Peak.Height.Percentile	P_value
PBS_248-1	2281271	2281292	99.653	0.000247297
PBS_248-2	2281269	2281290	99.653	0.000247297
PBS_248-3	2948585	2948606	94.667	0.000247297
PBS_248-8	2948587	2948608	94.667	0.000247297
PBS_72-29	669804	669816	99.415	0.00232524
PBS_72-2	2281084	2281096	99.653	0.00232524
PBS_72-11	2281262	2281274	99.653	0.00232524
PBS_72-19	2281142	2281154	99.653	0.00232524
PBS_72-43	2281187	2281199	99.653	0.00232524
PBS_148-10	1828045	1828052	95.867	0.00363407
PBS_148-6	2174023	2174030	82.34	0.00363407
PBS_148-26	2948613	2948620	94.667	0.00363407
PBS_3-169	781345	781358	81.034	0.00840652
PBS_3-130	2174002	2174015	82.34	0.00840652
PBS_3-108	2281272	2281285	99.653	0.00840652
PBS_3-119	2281271	2281284	99.653	0.00840652
PBS_3-204	2948588	2948601	94.667	0.00840652
PBS_3-226	2948586	2948599	94.667	0.00840652
PBS_3-69	4312732	4312745	97.228	0.00840652
PBS_3-71	4312733	4312746	97.228	0.00840652
PBS_182-7	669770	669777	99.415	0.00840652
PBS_182-6	2281278	2281285	99.653	0.00840652
PBS_121-17	669800	669821	99.415	0.0109192
PBS_121-19	669820	669841	99.415	0.0109192
PBS_127-10	669806	669819	99.415	0.0124714
PBS_127-14	669822	669835	99.415	0.0124714
PBS_127-9	2821653	2821666	94.211	0.0124714
PBS_158-3	2948608	2948618	94.667	0.013473
PBS_158-13	2948593	2948603	94.667	0.013473
PBS_125-29	2281127	2281141	99.653	0.0200468
PBS_125-4	4312745	4312759	97.228	0.0200468
PBS_179-25	669759	669773	99.415	0.0235585
PBS_179-10	781425	781439	81.034	0.0235585
PBS_109-28	1827957	1827970	95.867	0.0294248
PBS_109-21	2173921	2173934	82.34	0.0294248
PBS_66-2	2281190	2281200	99.653	0.0325951
PBS_66-55	2281145	2281155	99.653	0.0325951
PBS_66-62	2281087	2281097	99.653	0.0325951
PBS_249-15	2174052	2174061	82.34	0.0325951
PBS_249-34	2173955	2173964	82.34	0.0325951
PBS_49-33	1827981	1828001	95.867	0.0325951
PBS_49-30	2173962	2173982	82.34	0.0325951
PBS_223-13	4025643	4025661	96.582	0.0325951
PBS_204-10	669750	669759	99.415	0.0380435
PBS_25-50	2281275	2281288	99.653	0.0430754
PBS_25-26	4312739	4312752	97.228	0.0430754
PBS_80-50	781390	781400	81.034	0.0430754
PBS_80-14	2174004	2174014	82.34	0.0430754
PBS_153-15	1828064	1828072	95.867	0.0430754
PBS_197-17	2281187	2281200	99.653	0.0430754
PBS_232-1	669792	669800	99.415	0.0430754
PBS_71-8	1828019	1828040	95.867	0.0430754
PBS_184-12	2948612	2948619	94.667	0.0449936
PBS_151-16	4025634	4025654	96.582	0.0471577
PBS_176-20	669802	669811	99.415	0.0477414
PBS_195-9	4312679	4312693	97.228	0.0477414
PBS_205-10	2281240	2281250	99.653	0.0477414
PBS_224-18	3874223	3874230	82.594	0.0477414
Rv2359
PBS	PBS_Start	PBS_End	ChiP.Peak.Height.Percentile	P_value
PBS_76-4	124343	124363	99.707	4.42e-21
PBS_76-5	124289	124309	99.707	4.42e-21
PBS_76-8	124289	124309	99.707	4.42e-21
PBS_76-3	339321	339341	99.765	4.42e-21
PBS_76-7	339321	339341	99.765	4.42e-21
PBS_76-6	341944	341964	99.219	4.42e-21
PBS_76-9	1561385	1561405	91.378	4.42e-21
PBS_76-1	2315089	2315109	99.934	4.42e-21
PBS_76-2	2315089	2315109	99.934	4.42e-21
PBS_76-10	2315144	2315164	99.934	4.42e-21
PBS_146-2	542906	542920	95.191	0.00162539
PBS_146-16	543034	543048	95.191	0.00162539
PBS_146-7	1561332	1561346	91.378	0.00162539
PBS_209-25	3347858	3347865	97.608	0.00579837
PBS_209-43	3347756	3347763	97.608	0.00579837
PBS_209-44	3347916	3347923	97.608	0.00579837
PBS_215-16	542939	542949	95.191	0.00579837
PBS_215-2	1561432	1561442	91.378	0.00579837
PBS_135-10	339128	339139	99.765	0.0103551
PBS_135-21	339183	339194	99.765	0.0103551
PBS_191-9	543045	543052	95.191	0.0103551
PBS_191-18	1561378	1561385	91.378	0.0103551
PBS_130-3	542981	542989	95.191	0.0107338
PBS_130-15	1561399	1561407	91.378	0.0107338
PBS_14-125	124344	124354	99.707	0.0125765
PBS_14-54	339291	339301	99.765	0.0125765
PBS_14-117	339153	339163	99.765	0.0125765
PBS_14-121	339174	339184	99.765	0.0125765
PBS_203-33	339259	339266	99.765	0.0196462
PBS_203-27	341911	341918	99.219	0.0196462
PBS_40-53	543045	543055	95.191	0.0196991
PBS_40-54	1561431	1561441	91.378	0.0196991
PBS_40-83	1561383	1561393	91.378	0.0196991
PBS_82-13	339287	339294	99.765	0.0196991
PBS_82-37	542963	542970	95.191	0.0196991
PBS_207-6	339130	339145	99.765	0.0196991
PBS_241-8	342073	342087	99.219	0.0196991
PBS_216-17	339187	339198	99.765	0.0288252
PBS_188-1	341967	341979	99.219	0.033561
PBS_188-5	342075	342087	99.219	0.033561
PBS_84-50	3347788	3347798	97.608	0.033561
PBS_84-53	3347858	3347868	97.608	0.033561
PBS_20-22	339121	339131	99.765	0.0345473
PBS_20-111	2315152	2315162	99.934	0.0345473
PBS_20-118	2315084	2315094	99.934	0.0345473
PBS_17-45	124271	124281	99.707	0.0345473
PBS_17-9	2315160	2315170	99.934	0.0345473
PBS_29-15	339185	339192	99.765	0.0345473
PBS_29-73	339318	339325	99.765	0.0345473
PBS_73-24	2315130	2315137	99.934	0.0345473
PBS_73-47	2315074	2315081	99.934	0.0345473
PBS_136-2	2315123	2315133	99.934	0.0345473
PBS_158-5	339180	339190	99.765	0.0345473
PBS_70-21	124335	124348	99.707	0.0345473
PBS_142-25	124350	124360	99.707	0.0356783
PBS_148-24	2315149	2315156	99.934	0.0415651
PBS_128-23	2315065	2315079	99.934	0.0449721
PBS_45-30	543001	543010	95.191	0.0464519
PBS_45-40	1561286	1561295	91.378	0.0464519
Rv2506
PBS	PBS_Start	PBS_End	ChiP.Peak.Height.Percentile	P_value
PBS_171-35	2821636	2821648	98.44	0.000487212
PBS_65-17	2821660	2821673	98.44	0.000487212
PBS_156-28	2821683	2821696	98.44	0.000491879
PBS_127-9	2821653	2821666	98.44	0.000561445
PBS_37-69	2821626	2821634	98.44	0.00112677
PBS_1-123	2822409	2822422	98.44	0.0011507
PBS_1-380	2821652	2821665	98.44	0.0011507
Rv2621c
PBS	PBS_Start	PBS_End	ChiP.Peak.Height.Percentile	P_value
PBS_158-3	2948608	2948618	95.596	2.5e-05
PBS_158-13	2948593	2948603	95.596	2.5e-05
PBS_248-3	2948585	2948606	95.596	2.5e-05
PBS_248-8	2948587	2948608	95.596	2.5e-05
PBS_184-12	2948612	2948619	95.596	0.00114132
PBS_148-26	2948613	2948620	95.596	0.00188215
PBS_62-16	2948583	2948590	95.596	0.00276659
PBS_3-204	2948588	2948601	95.596	0.00533267
PBS_3-226	2948586	2948599	95.596	0.00533267
PBS_17-66	2948617	2948627	95.596	0.00533267
PBS_38-14	2948608	2948622	95.596	0.00533267
PBS_108-53	2948611	2948618	95.596	0.00691291
PBS_41-40	2948563	2948572	95.596	0.00918351
PBS_14-32	2948575	2948585	95.596	0.00994091
PBS_16-68	2948605	2948615	95.596	0.00994091
Rv2779c
PBS	PBS_Start	PBS_End	ChiP.Peak.Height.Percentile	P_value
PBS_201-19	3086789	3086799	99.575	0.000500864
PBS_218-9	3086776	3086783	99.575	0.000500864
PBS_131-14	3086797	3086804	99.575	0.00143449
PBS_237-30	3086795	3086807	99.575	0.00191445
PBS_73-29	3086772	3086779	99.575	0.00300798
PBS_33-23	3086802	3086811	99.575	0.00323187
PBS_48-46	3086767	3086774	99.575	0.00407903
PBS_14-80	3086808	3086818	99.575	0.00550593
PBS_9-134	3086771	3086780	99.575	0.00592721
PBS_3-205	3086794	3086807	99.575	0.0180318
Rv2887
PBS	PBS_Start	PBS_End	ChiP.Peak.Height.Percentile	P_value
PBS_87-2	1340610	1340620	82.705	5.01e-07
PBS_87-3	1340550	1340560	82.705	5.01e-07
PBS_87-9	1340980	1340990	82.705	5.01e-07
PBS_87-1	2626558	2626568	82.733	5.01e-07
PBS_87-4	2626618	2626628	82.733	5.01e-07
PBS_87-10	2626188	2626198	82.733	5.01e-07
PBS_38-8	1190684	1190698	98.869	0.000347314
PBS_38-39	1190460	1190474	98.869	0.000347314
PBS_38-11	2614104	2614118	98.431	0.000347314
PBS_38-7	2626621	2626635	82.733	0.000347314
PBS_38-13	2626191	2626205	82.733	0.000347314
PBS_187-2	1340587	1340597	82.705	0.000423805
PBS_187-1	2626581	2626591	82.733	0.000423805
PBS_187-15	2626192	2626202	82.733	0.000423805
PBS_127-35	2614259	2614272	98.431	0.000492671
PBS_127-37	2614366	2614379	98.431	0.000492671
PBS_127-44	2614555	2614568	98.431	0.000492671
PBS_127-47	2614197	2614210	98.431	0.000492671
PBS_125-9	3214479	3214493	91.997	0.000604311
PBS_125-20	3214542	3214556	91.997	0.000604311
PBS_125-22	3214412	3214426	91.997	0.000604311
PBS_148-21	2226169	2226176	84.048	0.000604311
PBS_148-19	2614210	2614217	98.431	0.000604311
PBS_148-31	2614156	2614163	98.431	0.000604311
PBS_213-8	2614505	2614512	98.431	0.00633663
PBS_213-11	2614108	2614115	98.431	0.00633663
PBS_214-14	1340609	1340622	82.705	0.00633663
PBS_214-13	2626556	2626569	82.733	0.00633663
PBS_67-2	2614308	2614318	98.431	0.0095284
PBS_67-50	3214436	3214446	91.997	0.0095284
PBS_67-53	3214264	3214274	91.997	0.0095284
PBS_129-25	2226114	2226124	84.048	0.0107471
PBS_129-4	3214433	3214443	91.997	0.0107471
PBS_83-18	2614491	2614505	98.431	0.0107471
PBS_83-23	2614362	2614376	98.431	0.0107471
PBS_241-9	2626571	2626585	82.733	0.0234567
PBS_237-52	1340624	1340636	82.705	0.02596
PBS_237-51	2626542	2626554	82.733	0.02596
PBS_212-15	2226162	2226170	84.048	0.0321512
PBS_42-11	1340558	1340568	82.705	0.0363298
PBS_42-56	2226218	2226228	84.048	0.0363298
PBS_42-12	2626610	2626620	82.733	0.0363298
PBS_164-23	3393208	3393220	99.167	0.0363298
PBS_235-21	2422205	2422214	91.936	0.0363298
PBS_250-9	1190727	1190738	98.869	0.0363298
PBS_136-22	1340971	1340981	82.705	0.0373762
PBS_46-22	2226132	2226141	84.048	0.0404952
PBS_46-24	2226156	2226165	84.048	0.0404952
PBS_158-6	2614401	2614411	98.431	0.0404952
PBS_186-5	2226136	2226148	84.048	0.0404952
PBS_126-8	2614263	2614273	98.431	0.0453823
PBS_163-11	3214284	3214294	91.997	0.0453823
PBS_146-13	2614540	2614554	98.431	0.046361
Rv2989
PBS	PBS_Start	PBS_End	ChiP.Peak.Height.Percentile	P_value
PBS_165-2	3691006	3691019	92.006	0.00379028
PBS_165-7	3690948	3690961	92.006	0.00379028
PBS_176-1	2270412	2270421	96.772	0.00379028
PBS_176-11	2270352	2270361	96.772	0.00379028
PBS_59-3	13594	13603	87.825	0.00396218
PBS_59-16	4099284	4099293	82.739	0.00396218
PBS_115-4	3691004	3691019	92.006	0.00444111
PBS_115-5	3690946	3690961	92.006	0.00444111
PBS_171-10	4181730	4181742	81.155	0.00444111
PBS_171-14	4181729	4181741	81.155	0.00444111
PBS_196-11	3691010	3691024	92.006	0.00444111
PBS_196-12	3690952	3690966	92.006	0.00444111
PBS_112-29	14049	14057	87.825	0.00826247
PBS_112-33	13655	13663	87.825	0.00826247
PBS_138-6	4099339	4099349	82.739	0.00826247
PBS_138-42	4099450	4099460	82.739	0.00826247
PBS_53-1	3690968	3690978	92.006	0.00826247
PBS_53-17	3691027	3691037	92.006	0.00826247
PBS_117-3	4181730	4181737	81.155	0.00958872
PBS_117-30	4181734	4181741	81.155	0.00958872
PBS_212-2	935499	935507	95.746	0.0107761
PBS_232-3	14050	14058	87.825	0.0107761
PBS_5-44	935556	935566	95.746	0.0128534
PBS_5-130	935512	935522	95.746	0.0128534
PBS_5-18	3691013	3691023	92.006	0.0128534
PBS_73-57	14023	14030	87.825	0.0128534
PBS_73-68	2270414	2270421	96.772	0.0128534
PBS_132-21	2270479	2270493	96.772	0.0128534
PBS_136-14	13665	13675	87.825	0.0128534
PBS_7-42	13695	13704	87.825	0.0129616
PBS_7-68	13591	13600	87.825	0.0129616
PBS_7-35	2772348	2772357	84.898	0.0129616
PBS_10-15	3690979	3690992	92.006	0.0129616
PBS_10-72	4099404	4099417	82.739	0.0129616
PBS_33-50	13616	13625	87.825	0.0129616
PBS_33-22	4099284	4099293	82.739	0.0129616
PBS_213-16	935508	935515	95.746	0.0129616
PBS_100-21	2087927	2087935	92.317	0.0161619
PBS_130-19	14036	14044	87.825	0.0164073
PBS_222-13	935559	935569	95.746	0.0218543
PBS_27-50	935514	935521	95.746	0.0235897
PBS_27-67	935558	935565	95.746	0.0235897
PBS_16-111	3691008	3691018	92.006	0.0278802
PBS_16-112	3690953	3690963	92.006	0.0278802
PBS_177-35	4099478	4099492	82.739	0.0278802
PBS_43-31	935556	935568	95.746	0.0278802
PBS_82-27	14048	14055	87.825	0.0290762
PBS_80-29	2087946	2087956	92.317	0.034817
PBS_86-4	935549	935562	95.746	0.034817
PBS_225-20	2270425	2270438	96.772	0.0406549
Rv3050c
PBS	PBS_Start	PBS_End	ChiP.Peak.Height.Percentile	P_value
PBS_115-23	3411107	3411122	94.54	0.000386863
PBS_125-26	3411150	3411164	94.54	0.000386863
PBS_142-26	3411172	3411182	94.54	0.000386863
PBS_173-30	3411167	3411176	94.54	0.000386863
PBS_232-17	3411199	3411207	94.54	0.000386863
PBS_38-16	3411197	3411211	94.54	0.00125735
PBS_31-47	3411191	3411209	94.54	0.0014245
PBS_16-17	3411194	3411204	94.54	0.00264898
Rv3066
PBS	PBS_Start	PBS_End	ChiP.Peak.Height.Percentile	P_value
PBS_250-19	3798830	3798841	98.772	0.000193859
PBS_250-22	3799086	3799097	98.772	0.000193859
PBS_142-7	3798894	3798904	98.772	0.000204623
PBS_142-16	3798845	3798855	98.772	0.000204623
PBS_138-6	4099339	4099349	80.37	0.000999172
PBS_138-42	4099450	4099460	80.37	0.000999172
PBS_40-44	3798950	3798960	98.772	0.00350125
PBS_40-73	3799099	3799109	98.772	0.00350125
PBS_165-23	3799214	3799227	98.772	0.00406521
PBS_178-20	3430257	3430267	99.925	0.00406521
PBS_221-6	3430335	3430349	99.925	0.00406521
PBS_59-16	4099284	4099293	80.37	0.00406521
PBS_174-3	3430275	3430292	99.925	0.00409338
PBS_143-18	3430313	3430320	99.925	0.00487611
PBS_177-35	4099478	4099492	80.37	0.00674407
PBS_116-1	3798874	3798883	98.772	0.0109595
PBS_47-50	3431326	3431339	99.925	0.0118403
PBS_55-16	3799144	3799151	98.772	0.0118403
PBS_10-72	4099404	4099417	80.37	0.012722
PBS_33-22	4099284	4099293	80.37	0.012722
PBS_37-15	3430313	3430321	99.925	0.012722
PBS_85-55	3798895	3798905	98.772	0.012722
PBS_14-87	3799057	3799067	98.772	0.0259133
Rv3095
PBS	PBS_Start	PBS_End	ChiP.Peak.Height.Percentile	P_value
PBS_201-11	3463947	3463957	96.588	7.41e-06
PBS_201-17	3463953	3463963	96.588	7.41e-06
PBS_136-4	3463953	3463963	96.588	0.00129834
PBS_173-15	3463919	3463928	96.588	0.00164105
PBS_196-37	3463943	3463957	96.588	0.00164105
PBS_236-42	3463956	3463965	96.588	0.00220781
PBS_52-50	3463923	3463933	96.588	0.00220781
PBS_17-23	3463897	3463907	96.588	0.00267549
PBS_73-34	3463946	3463953	96.588	0.00267549
PBS_78-46	3463904	3463911	96.588	0.00267549
PBS_93-36	3463955	3463965	96.588	0.00274412
PBS_15-114	3463941	3463955	96.588	0.00892958
Rv3133c
PBS	PBS_Start	PBS_End	ChiP.Peak.Height.Percentile	P_value
PBS_51-4	88116	88132	88.153	2.48e-40
PBS_51-14	660909	660925	92.175	2.48e-40
PBS_51-5	668489	668505	98.498	2.48e-40
PBS_51-10	1961048	1961064	99.059	2.48e-40
PBS_51-15	1960616	1960632	99.059	2.48e-40
PBS_51-23	1960512	1960528	99.059	2.48e-40
PBS_51-2	1965463	1965479	98.006	2.48e-40
PBS_51-11	1965524	1965540	98.006	2.48e-40
PBS_51-17	1965525	1965541	98.006	2.48e-40
PBS_51-21	1965462	1965478	98.006	2.48e-40
PBS_51-18	2238929	2238945	98.742	2.48e-40
PBS_51-12	2240070	2240086	95.638	2.48e-40
PBS_51-20	2251937	2251953	96.887	2.48e-40
PBS_51-28	2251936	2251952	96.887	2.48e-40
PBS_51-22	2256488	2256504	99.357	2.48e-40
PBS_51-6	2279053	2279069	99.668	2.48e-40
PBS_51-7	2278997	2279013	99.668	2.48e-40
PBS_51-19	2949463	2949479	97.976	2.48e-40
PBS_51-27	2953366	2953382	95.943	2.48e-40
PBS_51-29	2953089	2953105	95.943	2.48e-40
PBS_51-32	2953232	2953248	95.943	2.48e-40
PBS_51-3	2954783	2954799	99.068	2.48e-40
PBS_51-8	2954784	2954800	99.068	2.48e-40
PBS_51-9	2955023	2955039	99.068	2.48e-40
PBS_51-16	2955022	2955038	99.068	2.48e-40
PBS_51-13	3496443	3496459	98.555	2.48e-40
PBS_51-1	3500845	3500861	98.142	2.48e-40
PBS_219-3	2651588	2651598	92.181	0.00553413
PBS_219-21	2955501	2955511	99.068	0.00553413
PBS_219-33	2955545	2955555	99.068	0.00553413
PBS_219-8	3491732	3491742	98.624	0.00553413
PBS_219-9	3492129	3492139	98.624	0.00553413
PBS_149-2	1957607	1957618	97.213	0.00553413
PBS_149-14	2251942	2251953	96.887	0.00553413
PBS_149-9	2278996	2279007	99.668	0.00553413
PBS_149-16	2279053	2279064	99.668	0.00553413
PBS_229-9	2953233	2953240	95.943	0.0138079
PBS_229-25	2953032	2953039	95.943	0.0138079
PBS_229-26	2953090	2953097	95.943	0.0138079
PBS_229-27	2954952	2954959	99.068	0.0138079
PBS_31-20	1961974	1961992	86.084	0.0196783
PBS_31-53	1962207	1962225	86.084	0.0196783
PBS_31-36	1965541	1965559	98.006	0.0196783
PBS_31-48	1965432	1965450	98.006	0.0196783
PBS_31-80	1965384	1965402	98.006	0.0196783
PBS_31-41	2056487	2056505	99.249	0.0196783
PBS_31-78	2056158	2056176	99.249	0.0196783
PBS_147-22	1957466	1957475	97.213	0.0393483
PBS_147-15	2954923	2954932	99.068	0.0393483
PBS_147-20	2954816	2954825	99.068	0.0393483
Rv3160c
PBS	PBS_Start	PBS_End	ChiP.Peak.Height.Percentile	P_value
PBS_6-48	1735602	1735612	83.638	0.000668103
PBS_6-8	2121484	2121494	81.128	0.000668103
PBS_6-73	3531158	3531168	97.05	0.000668103
PBS_236-18	2121442	2121451	81.128	0.000668103
PBS_236-5	3531189	3531198	97.05	0.000668103
PBS_14-20	2121440	2121450	81.128	0.00278541
PBS_14-23	4056428	4056438	80.217	0.00278541
PBS_59-12	3531167	3531176	97.05	0.00278541
PBS_88-11	3531162	3531171	97.05	0.00535912
PBS_107-8	2121444	2121453	81.128	0.00632027
PBS_230-44	2121483	2121490	81.128	0.00632027
PBS_38-21	3531166	3531180	97.05	0.00867927
PBS_58-72	3531159	3531172	97.05	0.00922093
PBS_40-36	3531167	3531177	97.05	0.00968456
PBS_45-23	2121457	2121466	81.128	0.00968456
PBS_30-94	2121471	2121485	81.128	0.00984314
PBS_7-21	3531146	3531155	97.05	0.0245529
Rv3219
PBS	PBS_Start	PBS_End	ChiP.Peak.Height.Percentile	P_value
PBS_134-1	800188	800196	85.405	7.85e-05
PBS_35-11	800327	800339	85.405	9.47e-05
PBS_67-42	800280	800290	85.405	9.47e-05
Rv3246c
PBS	PBS_Start	PBS_End	ChiP.Peak.Height.Percentile	P_value
PBS_50-9	1061791	1061806	93.034	4.79e-06
PBS_50-11	1061828	1061843	93.034	4.79e-06
PBS_50-18	1061828	1061843	93.034	4.79e-06
PBS_109-16	2849560	2849573	95.532	0.000147762
PBS_109-19	2849645	2849658	95.532	0.000147762
PBS_111-29	965879	965886	96.751	0.000147762
PBS_111-33	965845	965852	96.751	0.000147762
PBS_77-26	965740	965753	96.751	0.000461692
PBS_77-47	965884	965897	96.751	0.000461692
PBS_248-10	965781	965802	96.751	0.00256073
PBS_104-29	387818	387831	94.467	0.00307662
PBS_240-32	965838	965850	96.751	0.00307662
PBS_61-15	2849734	2849744	95.532	0.00386918
PBS_94-30	387861	387869	94.467	0.00504875
PBS_80-54	1128044	1128054	86.078	0.00531924
PBS_98-29	387822	387832	94.467	0.00531924
PBS_48-73	1061691	1061698	93.034	0.0142893
PBS_42-51	1127953	1127963	86.078	0.01831
PBS_4-110	387861	387875	94.467	0.0288075
PBS_8-135	387848	387857	94.467	0.0351818
Rv3249c
PBS	PBS_Start	PBS_End	ChiP.Peak.Height.Percentile	P_value
PBS_142-21	483731	483741	99.738	0.00397661
PBS_142-20	3632012	3632022	99.786	0.00397661
PBS_142-7	3798894	3798904	99.189	0.00397661
PBS_142-12	3798625	3798635	99.189	0.00397661
PBS_142-16	3798845	3798855	99.189	0.00397661
PBS_115-10	33851	33866	99.816	0.00691787
PBS_115-16	34157	34172	99.816	0.00691787
PBS_115-28	33932	33947	99.816	0.00691787
PBS_115-36	34065	34080	99.816	0.00691787
PBS_115-7	483918	483933	99.738	0.00691787
PBS_250-9	1190727	1190738	99.9	0.00691787
PBS_250-19	3798830	3798841	99.189	0.00691787
PBS_250-20	3798723	3798734	99.189	0.00691787
PBS_250-22	3799086	3799097	99.189	0.00691787
PBS_234-2	1574007	1574017	99.481	0.0248951
PBS_234-13	1573948	1573958	99.481	0.0248951
PBS_234-4	3798588	3798598	99.189	0.0248951
PBS_38-8	1190684	1190698	99.9	0.0269022
PBS_38-39	1190460	1190474	99.9	0.0269022
PBS_38-4	1573974	1573988	99.481	0.0269022
PBS_38-52	1773831	1773845	86.301	0.0269022
PBS_38-56	2366864	2366878	99.888	0.0269022
PBS_38-28	3595562	3595576	84.905	0.0269022
PBS_57-2	483837	483847	99.738	0.0269022
PBS_57-19	483849	483859	99.738	0.0269022
PBS_57-26	483908	483918	99.738	0.0269022
PBS_57-46	483788	483798	99.738	0.0269022
PBS_57-47	483677	483687	99.738	0.0269022
PBS_210-4	1573948	1573960	99.481	0.0303093
PBS_210-5	2170740	2170752	99.852	0.0303093
PBS_210-14	4336272	4336284	91.363	0.0303093
PBS_145-2	1241549	1241564	87.351	0.0361026
PBS_145-4	1241549	1241564	87.351	0.0361026
Rv3405c
PBS	PBS_Start	PBS_End	ChiP.Peak.Height.Percentile	P_value
PBS_237-26	3824637	3824649	99.906	0.00032245
PBS_237-35	3825299	3825311	99.906	0.00032245
PBS_205-15	3825284	3825294	99.906	0.00193596
PBS_131-16	3825273	3825280	99.906	0.00280585
PBS_68-11	3825305	3825312	99.906	0.00280585
PBS_144-45	3825308	3825322	99.906	0.0036845
PBS_98-15	3825280	3825290	99.906	0.00412178
PBS_2-70	3824607	3824626	99.906	0.00526669
PBS_93-25	3825271	3825281	99.906	0.00554379
PBS_37-52	3825286	3825294	99.906	0.00569824
PBS_14-112	3825306	3825316	99.906	0.0112749
PBS_6-142	3825309	3825319	99.906	0.0185805
PBS_3-72	3825271	3825284	99.906	0.0373664
Rv3557c
PBS	PBS_Start	PBS_End	ChiP.Peak.Height.Percentile	P_value
PBS_101-1	3989109	3989127	92.066	1.85e-16
PBS_101-2	3989110	3989128	92.066	1.85e-16
PBS_101-5	3997642	3997660	98.458	1.85e-16
PBS_101-7	3997643	3997661	98.458	1.85e-16
PBS_101-23	3997796	3997814	98.458	1.85e-16
PBS_101-6	4001606	4001624	88.084	1.85e-16
PBS_101-12	4001607	4001625	88.084	1.85e-16
PBS_24-21	3997637	3997647	98.458	0.000899651
PBS_24-47	4001592	4001602	88.084	0.000899651
PBS_159-7	3997725	3997733	98.458	0.00251694
PBS_17-49	4001621	4001631	88.084	0.00471467
PBS_38-73	4001620	4001634	88.084	0.00471467
PBS_46-11	3989125	3989134	92.066	0.00471467
PBS_23-27	3997695	3997705	98.458	0.00713191
PBS_3-47	4001593	4001606	88.084	0.0392516
Rv3574
PBS	PBS_Start	PBS_End	ChiP.Peak.Height.Percentile	P_value
PBS_11-15	267845	267859	94.437	3.17e-53
PBS_11-21	642821	642835	93.746	3.17e-53
PBS_11-28	642822	642836	93.746	3.17e-53
PBS_11-8	787046	787060	93.906	3.17e-53
PBS_11-2	1051497	1051511	94.682	3.17e-53
PBS_11-4	1064971	1064985	92.374	3.17e-53
PBS_11-11	1064972	1064986	92.374	3.17e-53
PBS_11-29	1830592	1830606	93.87	3.17e-53
PBS_11-31	1830593	1830607	93.87	3.17e-53
PBS_11-32	2058992	2059006	94.262	3.17e-53
PBS_11-7	2141905	2141919	97.264	3.17e-53
PBS_11-26	3107727	3107741	92.332	3.17e-53
PBS_11-33	3107726	3107740	92.332	3.17e-53
PBS_11-13	3922350	3922364	93.14	3.17e-53
PBS_11-17	3922351	3922365	93.14	3.17e-53
PBS_11-12	3952475	3952489	93.11	3.17e-53
PBS_11-25	3952476	3952490	93.11	3.17e-53
PBS_11-14	3957403	3957417	85.825	3.17e-53
PBS_11-20	3957404	3957418	85.825	3.17e-53
PBS_11-9	3962396	3962410	96.229	3.17e-53
PBS_11-16	3962397	3962411	96.229	3.17e-53
PBS_11-19	3968955	3968969	94.498	3.17e-53
PBS_11-23	3968956	3968970	94.498	3.17e-53
PBS_11-5	3975353	3975367	80.904	3.17e-53
PBS_11-22	3975354	3975368	80.904	3.17e-53
PBS_11-18	3985532	3985546	93.185	3.17e-53
PBS_11-24	3985533	3985547	93.185	3.17e-53
PBS_11-6	4012377	4012391	98.579	3.17e-53
PBS_11-10	4012378	4012392	98.579	3.17e-53
PBS_11-27	4012310	4012324	98.579	3.17e-53
PBS_11-1	4016265	4016279	98.296	3.17e-53
PBS_11-3	4016266	4016280	98.296	3.17e-53
PBS_182-15	642856	642863	93.746	0.0456794
PBS_182-14	3962325	3962332	96.229	0.0456794
PBS_19-17	786971	786992	93.906	0.0457579
PBS_19-23	3107666	3107687	92.332	0.0457579
PBS_195-8	1065005	1065019	92.374	0.0457579
PBS_195-2	3107748	3107762	92.332	0.0457579
PBS_3-185	267816	267829	94.437	0.0460885
PBS_3-179	642871	642884	93.746	0.0460885
PBS_3-228	642814	642827	93.746	0.0460885
PBS_3-238	1064990	1065003	92.374	0.0460885
PBS_3-24	1830564	1830577	93.87	0.0460885
PBS_3-26	3922264	3922277	93.14	0.0460885
PBS_3-249	3952483	3952496	93.11	0.0460885
PBS_3-144	3969091	3969104	94.498	0.0460885
PBS_32-58	642816	642826	93.746	0.0479381
PBS_32-28	1064966	1064976	92.374	0.0479381
PBS_32-64	3905581	3905591	88.084	0.0479381
PBS_32-16	3969008	3969018	94.498	0.0479381
PBS_122-29	2059120	2059129	94.262	0.0479381
PBS_122-28	4012353	4012362	98.579	0.0479381
PBS_180-6	786971	786985	93.906	0.0479381
Rv3597c
PBS	PBS_Start	PBS_End	ChiP.Peak.Height.Percentile	P_value
PBS_126-12	1855746	1855756	82.22	0.00527499
PBS_126-27	1855649	1855659	82.22	0.00527499
PBS_126-29	1855577	1855587	82.22	0.00527499
PBS_126-7	2206956	2206966	91.858	0.00527499
PBS_126-14	2610626	2610636	94.271	0.00527499
PBS_126-21	2610731	2610741	94.271	0.00527499
PBS_126-8	2614263	2614273	95.559	0.00527499
PBS_126-15	3846797	3846807	89.39	0.00527499
PBS_126-26	3846393	3846403	89.39	0.00527499
PBS_108-63	226682	226689	86.956	0.00537525
PBS_108-8	483907	483914	96.718	0.00537525
PBS_108-28	590978	590985	80.865	0.00537525
PBS_108-13	1240174	1240181	98.136	0.00537525
PBS_108-19	1240123	1240130	98.136	0.00537525
PBS_108-74	1240968	1240975	90.989	0.00537525
PBS_108-31	1533700	1533707	80.304	0.00537525
PBS_108-56	1533782	1533789	80.304	0.00537525
PBS_108-65	2632536	2632543	87.363	0.00537525
PBS_108-1	3078108	3078115	89.792	0.00537525
PBS_108-35	3079018	3079025	86.85	0.00537525
PBS_108-58	3079092	3079099	86.85	0.00537525
PBS_108-75	3079129	3079136	86.85	0.00537525
PBS_108-49	3671836	3671843	94.232	0.00537525
PBS_108-16	4352942	4352949	86.458	0.00537525
PBS_108-50	4352983	4352990	86.458	0.00537525
PBS_108-57	4352907	4352914	86.458	0.00537525
PBS_233-67	2596294	2596304	85.26	0.014361
PBS_233-63	3671797	3671807	94.232	0.014361
PBS_233-13	3907149	3907159	84.778	0.014361
PBS_233-26	3907209	3907219	84.778	0.014361
PBS_233-41	3907277	3907287	84.778	0.014361
PBS_233-45	3907380	3907390	84.778	0.014361
PBS_233-46	3907434	3907444	84.778	0.014361
PBS_233-51	3907627	3907637	84.778	0.014361
PBS_233-17	4057393	4057403	96.326	0.014361
PBS_233-35	4056759	4056769	96.326	0.014361
PBS_233-52	4056666	4056676	96.326	0.014361
PBS_233-66	4057077	4057087	96.326	0.014361
PBS_233-58	4062230	4062240	97.475	0.014361
PBS_150-2	226692	226701	86.956	0.014361
PBS_150-15	226811	226820	86.956	0.014361
PBS_150-26	226721	226730	86.956	0.014361
PBS_150-27	226594	226603	86.956	0.014361
PBS_150-11	2632342	2632351	87.363	0.014361
PBS_150-29	2632282	2632291	87.363	0.014361
PBS_150-24	3078136	3078145	89.792	0.014361
PBS_150-1	4359894	4359903	93.653	0.014361
PBS_220-18	541928	541942	91.647	0.014361
PBS_220-4	4057298	4057312	96.326	0.014361
PBS_220-19	4062482	4062496	97.475	0.014361
PBS_220-9	4359855	4359869	93.653	0.014361
PBS_220-12	4359979	4359993	93.653	0.014361
PBS_220-13	4359933	4359947	93.653	0.014361
PBS_38-8	1190684	1190698	94.688	0.0187694
PBS_38-39	1190460	1190474	94.688	0.0187694
PBS_38-10	1533697	1533711	80.304	0.0187694
PBS_38-53	1533790	1533804	80.304	0.0187694
PBS_38-67	1533770	1533784	80.304	0.0187694
PBS_38-4	1573974	1573988	96.169	0.0187694
PBS_38-45	2229904	2229918	92.636	0.0187694
PBS_38-56	2366864	2366878	93.982	0.0187694
PBS_38-11	2614104	2614118	95.559	0.0187694
PBS_38-17	3078122	3078136	89.792	0.0187694
PBS_38-57	4057002	4057016	96.326	0.0187694
PBS_38-33	4062359	4062373	97.475	0.0187694
PBS_38-2	4360094	4360108	93.653	0.0187694
PBS_20-47	136132	136142	88.531	0.0201448
PBS_20-32	541928	541938	91.647	0.0201448
PBS_20-25	1696471	1696481	98.13	0.0201448
PBS_20-58	1695266	1695276	98.13	0.0201448
PBS_20-68	1696629	1696639	98.13	0.0201448
PBS_20-75	1696580	1696590	98.13	0.0201448
PBS_20-92	1696680	1696690	98.13	0.0201448
PBS_20-112	1696527	1696537	98.13	0.0201448
PBS_20-59	2234898	2234908	89.641	0.0201448
PBS_20-101	2453315	2453325	93.363	0.0201448
PBS_20-57	2579440	2579450	95.185	0.0201448
PBS_20-98	2580005	2580015	95.185	0.0201448
PBS_20-40	3015112	3015122	81.281	0.0201448
PBS_20-125	3650117	3650127	89.991	0.0201448
PBS_20-34	3907479	3907489	84.778	0.0201448
PBS_20-20	4062474	4062484	97.475	0.0201448
PBS_20-36	4062316	4062326	97.475	0.0201448
PBS_20-41	4062288	4062298	97.475	0.0201448
PBS_20-50	4062249	4062259	97.475	0.0201448
PBS_231-12	136088	136102	88.531	0.0432282
PBS_231-27	137911	137925	88.531	0.0432282
PBS_231-32	136246	136260	88.531	0.0432282
PBS_231-41	136197	136211	88.531	0.0432282
PBS_231-20	226798	226812	86.956	0.0432282
PBS_231-22	2405467	2405481	96.244	0.0432282
PBS_231-4	2634306	2634320	89.448	0.0432282
PBS_231-11	2634266	2634280	89.448	0.0432282
PBS_231-33	2634104	2634118	89.448	0.0432282
PBS_92-16	1701209	1701222	91.04	0.0432282
PBS_92-31	1984896	1984909	81.218	0.0432282
PBS_92-21	2170914	2170927	96.452	0.0432282
PBS_92-8	2234974	2234987	89.641	0.0432282
PBS_92-11	2610723	2610736	94.271	0.0432282
PBS_92-5	3511371	3511384	89.71	0.0432282
PBS_92-29	4057353	4057366	96.326	0.0432282
PBS_215-1	483865	483875	96.718	0.0432282
PBS_215-7	1524910	1524920	88.561	0.0432282
PBS_215-10	1525196	1525206	88.561	0.0432282
PBS_215-12	1525239	1525249	88.561	0.0432282
PBS_215-13	1525137	1525147	88.561	0.0432282
Rv3849
PBS	PBS_Start	PBS_End	ChiP.Peak.Height.Percentile	P_value
PBS_186-16	463321	463333	89.27	8.69e-05
PBS_186-19	463372	463384	89.27	8.69e-05
PBS_43-19	463378	463390	89.27	0.000202124
PBS_43-45	4056761	4056773	85.873	0.000202124
PBS_94-27	241300	241308	81.912	0.000202124
PBS_94-49	463313	463321	89.27	0.000202124
PBS_192-2	463351	463360	89.27	0.000648566
PBS_190-12	463381	463393	89.27	0.00198362
PBS_103-32	241298	241308	81.912	0.00353341
PBS_177-5	463373	463387	89.27	0.00353341
PBS_231-10	463363	463377	89.27	0.00353341
PBS_25-25	4056866	4056879	85.873	0.00366842
PBS_233-35	4056759	4056769	85.873	0.00570719
PBS_45-42	4056752	4056761	85.873	0.00776091
PBS_79-9	4056798	4056808	85.873	0.00776091
PBS_34-62	4056896	4056910	85.873	0.0118769
PBS_6-106	2982369	2982379	91.089	0.0228647
Rv3855
PBS	PBS_Start	PBS_End	ChiP.Peak.Height.Percentile	P_value
PBS_152-6	4327515	4327522	99.309	0.000412036
PBS_110-52	4327530	4327539	99.309	0.000627721
PBS_138-12	4327537	4327547	99.309	0.000627721
PBS_29-72	4327534	4327541	99.309	0.000627721
PBS_46-72	4327487	4327496	99.309	0.000627721
PBS_33-20	4327523	4327532	99.309	0.000657774
